# Supplementary material for: Amyloid β oligomers suppress excitatory transmitter release via presynaptic depletion of phosphatidylinositol-4,5-bisphosphate
Source: PubMed Central journal article supplement (PMC6416269; doi:10.1038/s41467-019-09114-z), 2019-03-13
Supplement: 41467_2019_9114_MOESM1_ESM.pdf [file 41467_2019_9114_MOESM1_ESM.pdf]

1  
2  
3  
4  
5  
6  
7  
8  
9  
10  
11  
12

**Supplementary Materials for**

**Amyloid  $\beta$  oligomers suppress excitatory transmitter release via presynaptic  
depletion of phosphatidylinositol-4,5-bisphosphate**

Yang He, Mengdi Wei, Yan Wu, Huaping Qin, Weinan Li, Xiaolin Ma, Jingjing Cheng,  
Jinshuai Ren, Ye Shen, Zhong Chen, Binggui Sun, Fu-De Huang, Yi Shen, and  
Yu-Dong Zhou

\*Correspondence: yudongzhou@zju.edu.cn (Y.-D.Z.), yshen2@zju.edu.cn (Y.S.), or  
Fude Huang: huangfd@sari.ac.cn (F.-D.H.)

**This PDF file includes:**

Figs. S1 to S15  
Materials and Methods

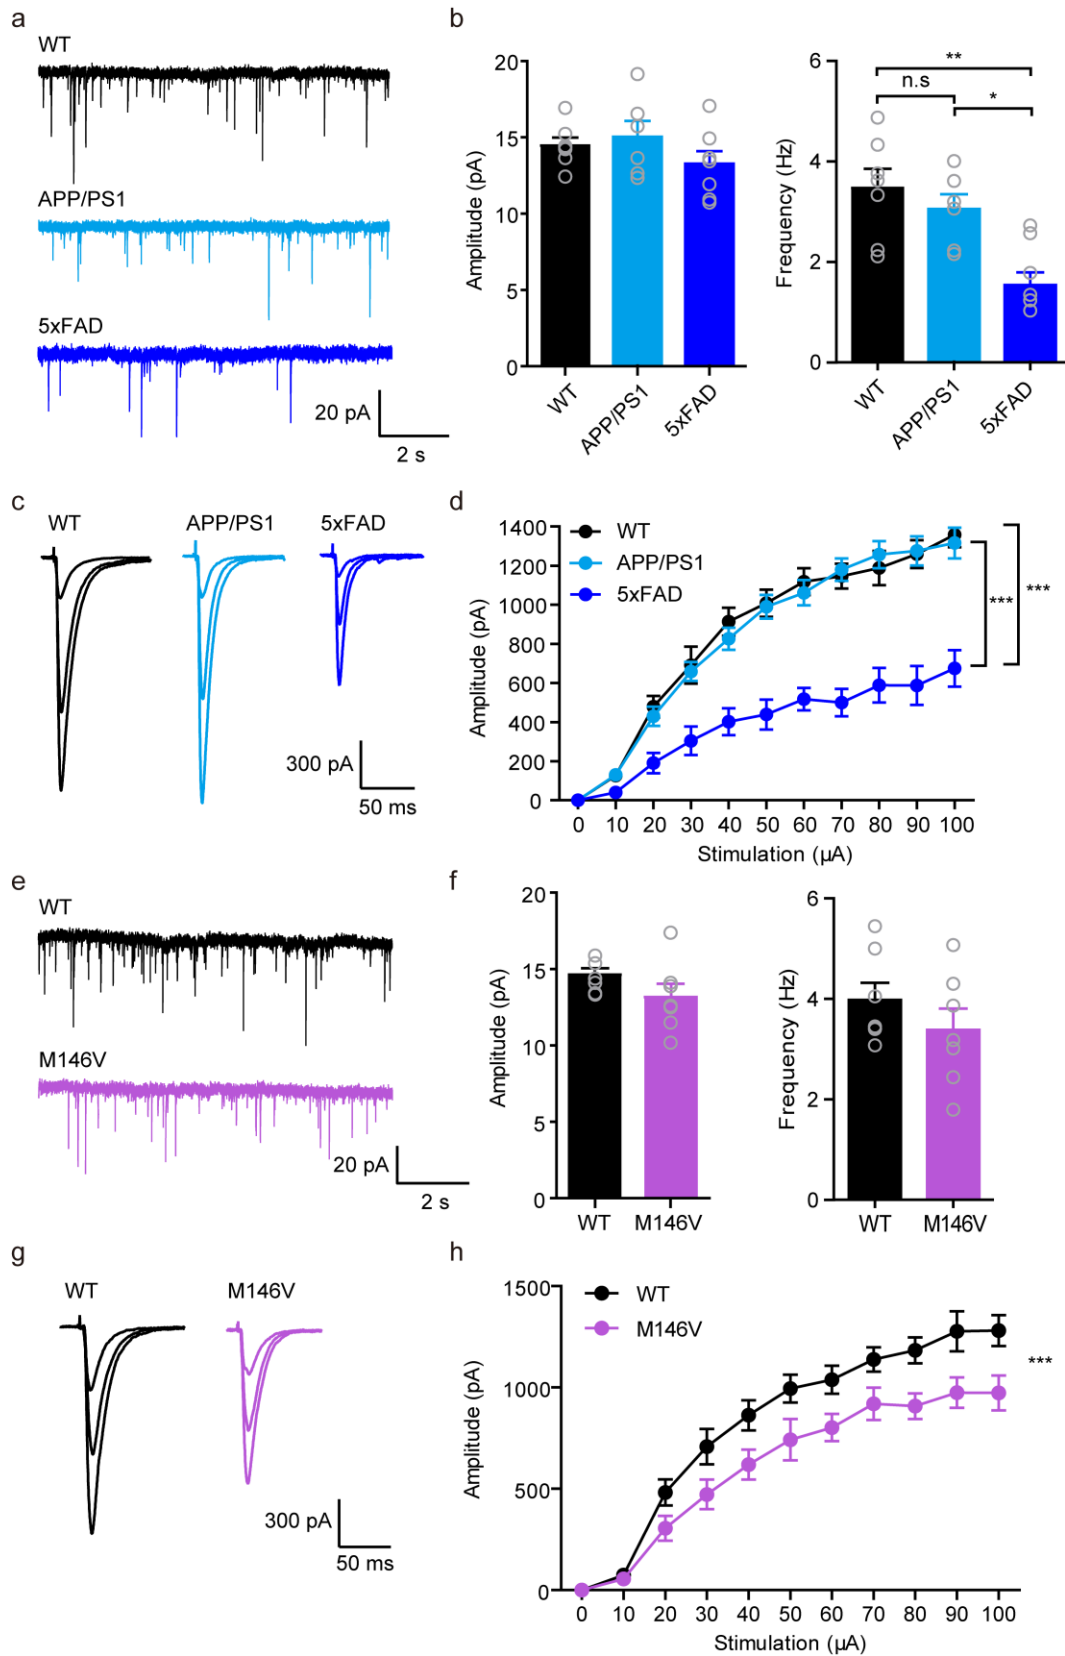

13

14 **Supplementary Figure 1** Excitatory synaptic transmission deficits in AD mouse

15 models. **a, b** Representative traces (**a**) of mEPSCs in CA1 pyramidal neurons and

16 quantification (**b**) of mEPSC amplitude (left) and frequency (right) in 4-month-old WT,  
17 APP/PS1, and 5xFAD mice. One-way ANOVA with post hoc Dunnett's test;  $F_{(2,17)} =$   
18 1.19 (amplitude);  $F_{(2,17)} = 9.484$  (frequency); \*,  $P < 0.05$ ; \*\*,  $P < 0.01$ ;  $N = 6-7$  per  
19 group. **c,d** Representative traces of SC-CA1 EPSCs evoked by stimulus intensities of  
20 10, 30, and 100  $\mu\text{A}$  (**c**) and quantification of EPSC amplitude to stimulus intensity (**d**)  
21 in 4-month-old WT, APP/PS1, and 5xFAD mice. Two-way ANOVA with post hoc  
22 Bonferroni test; animal,  $F_{(2,198)} = 168.1$ ,  $P < 0.001$ ; stimulation,  $F_{(10,198)} = 107.6$ ,  $P <$   
23  $0.001$ ; \*\*\*,  $P < 0.001$ ;  $N = 6-8$  per group. **e, f** Representative traces (**e**) of mEPSCs in  
24 CA1 pyramidal neurons and quantification (**f**) of mEPSC amplitude (left) and  
25 frequency (right) in 6-month-old WT and M146V mice.  $t$  test;  $P > 0.05$ ;  $N = 7$  per group.  
26 **g, h** Representative traces of SC-CA1 EPSCs evoked by stimulus intensities of 20, 40,  
27 and 100  $\mu\text{A}$  (**g**) and quantification of EPSC amplitude to stimulus intensity (**h**) in  
28 6-month-old WT and M146V mice. Two-way ANOVA with post hoc Bonferroni test;  
29 animal,  $F_{(1,143)} = 49.34$ ,  $P < 0.001$ ; stimulation,  $F_{(10,143)} = 70.41$ ,  $P < 0.001$ ; \*\*\*,  $P <$   
30  $0.001$ ;  $N = 7-8$  per group. Data are mean  $\pm$  SEM. Source data are provided as a  
31 Source Data file.

32

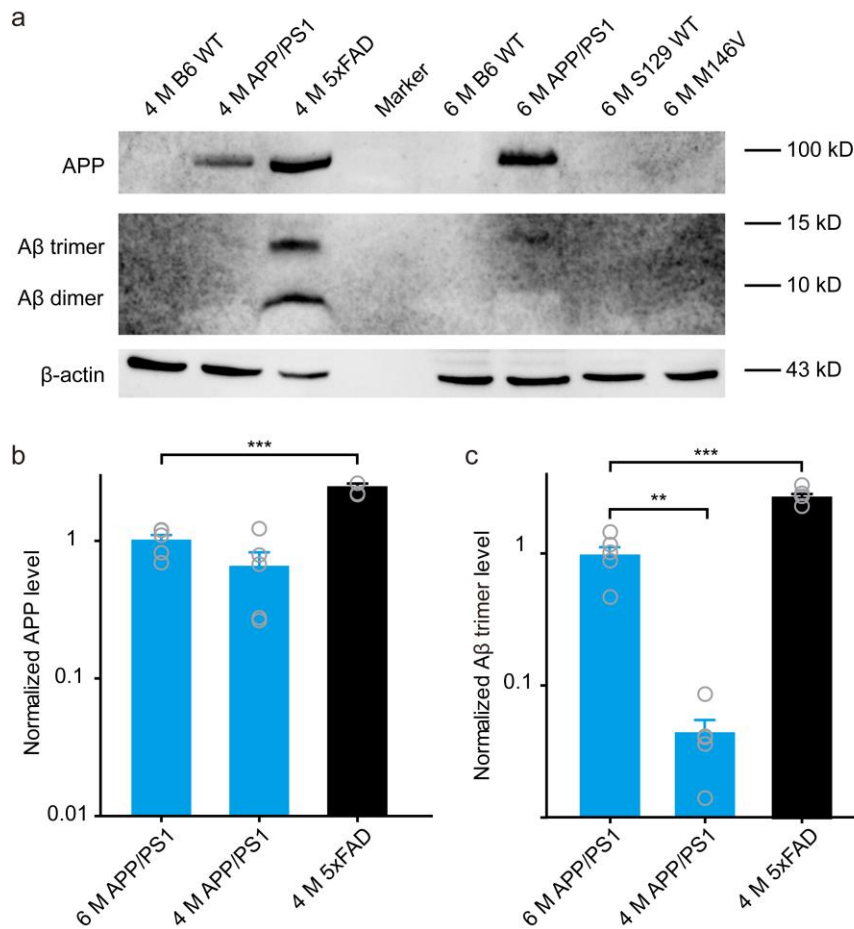

33

34

35 **Supplementary Figure 2** Oligomeric Aβ levels are greatly enhanced in 4-month-old

36 5xFAD and 6-month-old APP/PS1 mice in comparison to 4-month-old APP/PS1 mice.

37 **a** Representative Western blots of APP and Aβ oligomers (trimer/dimer) in

38 4-month-old (4 M) WT, APP/PS1, and 5xFAD mice and 6-month-old (6 M) WT,

39 APP/PS1, S129 WT, and M146V mice. **b, c** Quantification of APP (**b**) and Aβ trimer (**c**)

40 in 4 M 5xFAD, 4 M APP/PS1, and 6 M APP/PS1 mice. One-way ANOVA with post hoc

41 Dunnett's test;  $F_{(2,12)} = 39.025$  in **b**;  $F_{(2,12)} = 86.069$  in **c**; \*\*,  $P < 0.01$ ; \*\*\*,  $P < 0.001$ ;  $N$

42 = 5 per group. Data are mean ± SEM. Source data are provided as a Source Data file.

43

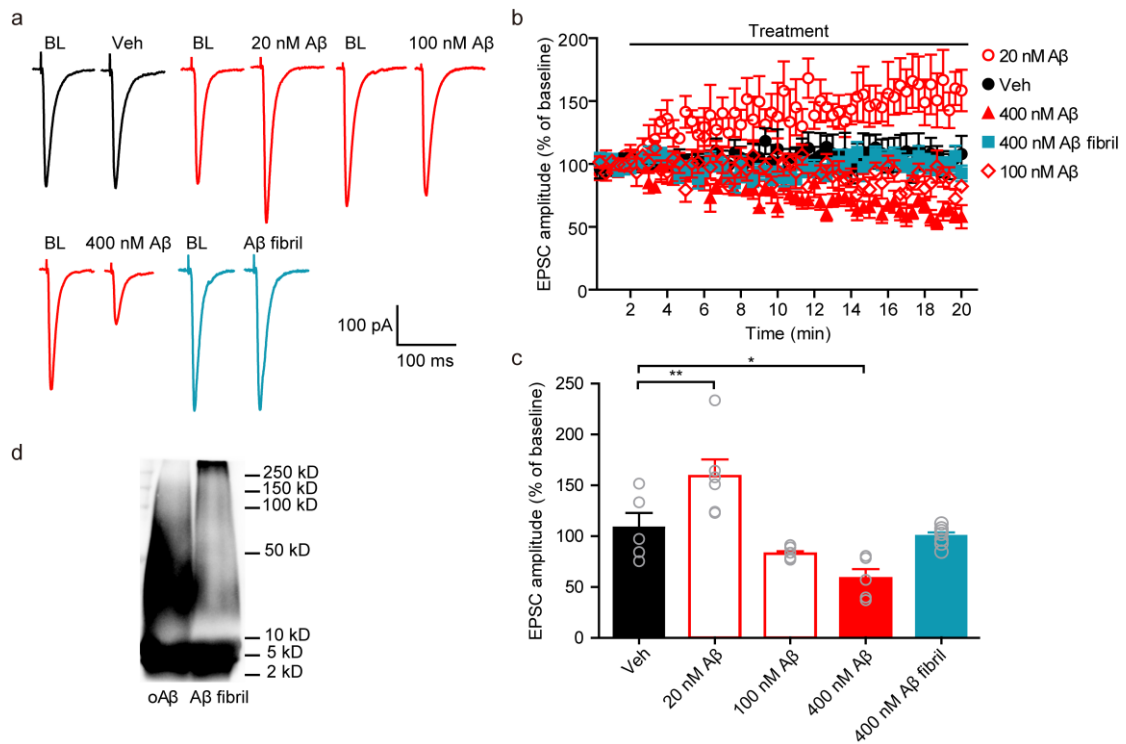

44

45

46 **Supplementary Figure 3** Regulation of evoked responses at the SC-CA1 synapse by

47 A $\beta$  fibrils and oligomers at various concentrations. **a, b** Representative traces (**a**) and

48 the time course (**b**) of evoked EPSCs at the SC-CA1 synapse before (baseline, BL)

49 and after DMSO (vehicle, Veh), oligomeric A $\beta_{42}$  (20, 100, or 400 nM), or fibrillar A $\beta_{42}$

50 (400 nM) treatment. **c** Quantification of EPSC amplitudes recorded in the last 1 min in

51 **b**. One-way ANOVA with post hoc Dunnett's test;  $F_{(4,24)} = 12.64$ ; \*,  $P < 0.05$ ; \*\*,  $P <$

52 0.01;  $N = 5-7$  per group. **d** Representative Western blots of synthetic oligomeric A $\beta_{42}$

53 (oA $\beta$ ) and fibrillar A $\beta_{42}$  (A $\beta$  fibril). Data are mean  $\pm$  SEM. Source data are provided as

54 a Source Data file.

55

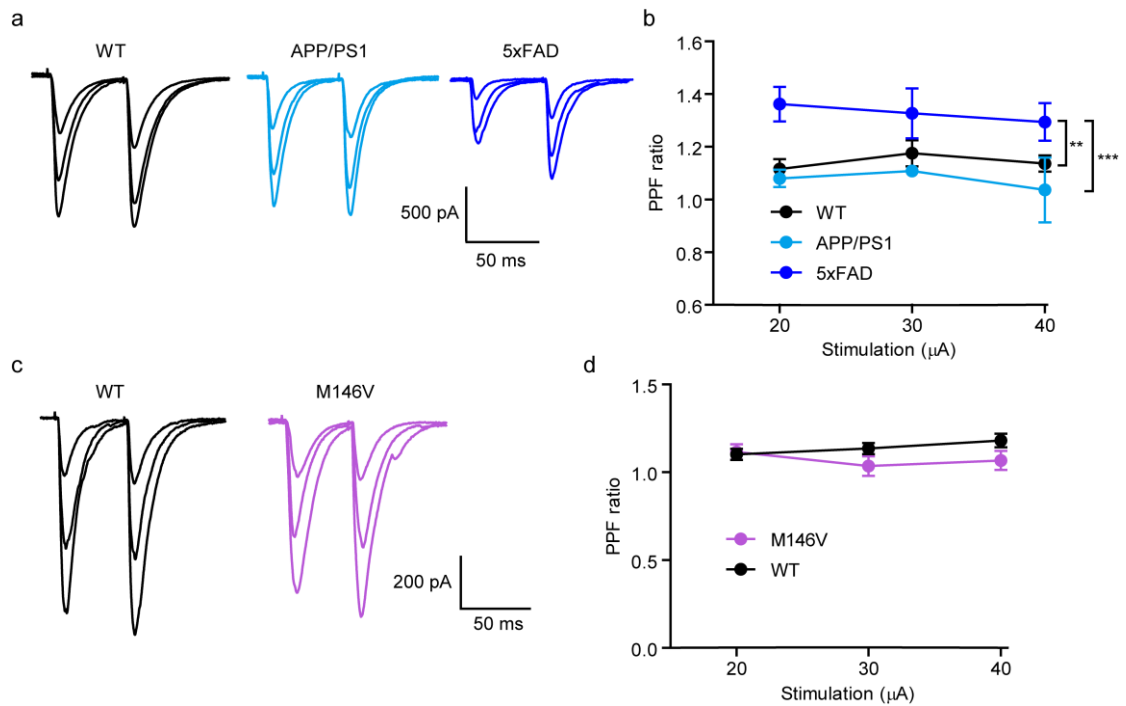

56

57

58 **Supplementary Figure 4** PPF at the SC-CA1 synapse is strongly increased in

59 4-month-old 5xFAD mice, but not in 6-month-old M146V mice. **a, b** Representative

60 traces (**a**) and quantification (**b**) of PPF in response to stimulus intensities of 20, 30,

61 and 40  $\mu\text{A}$  in 4-month-old WT, APP/PS1, and 5xFAD mice. Two-way ANOVA with post

62 hoc Bonferroni test; animal,  $F_{(2,51)} = 11.27$ ,  $P < 0.001$ ; stimulation,  $F_{(2,51)} = 0.3558$ ,  $P <$

63  $0.001$ ; \*\*,  $P < 0.01$ ; \*\*\*,  $P < 0.001$ ;  $N = 6-8$  per group. **c, d** Representative traces (**c**)

64 and quantification (**d**) of PPF in response to stimulus intensities of 20, 30, and 40  $\mu\text{A}$

65 in 6-month-old WT and M146V mice. Two-way ANOVA with post hoc Bonferroni test;

66 animal,  $F_{(1,42)} = 3.745$ ,  $P = 0.07$ ; stimulation,  $F_{(2,42)} = 0.4371$ ,  $P = 0.65$ ;  $P > 0.05$ ;  $N =$

67 7-9 per group. Data are mean  $\pm$  SEM. Source data are provided as a Source Data file.

68

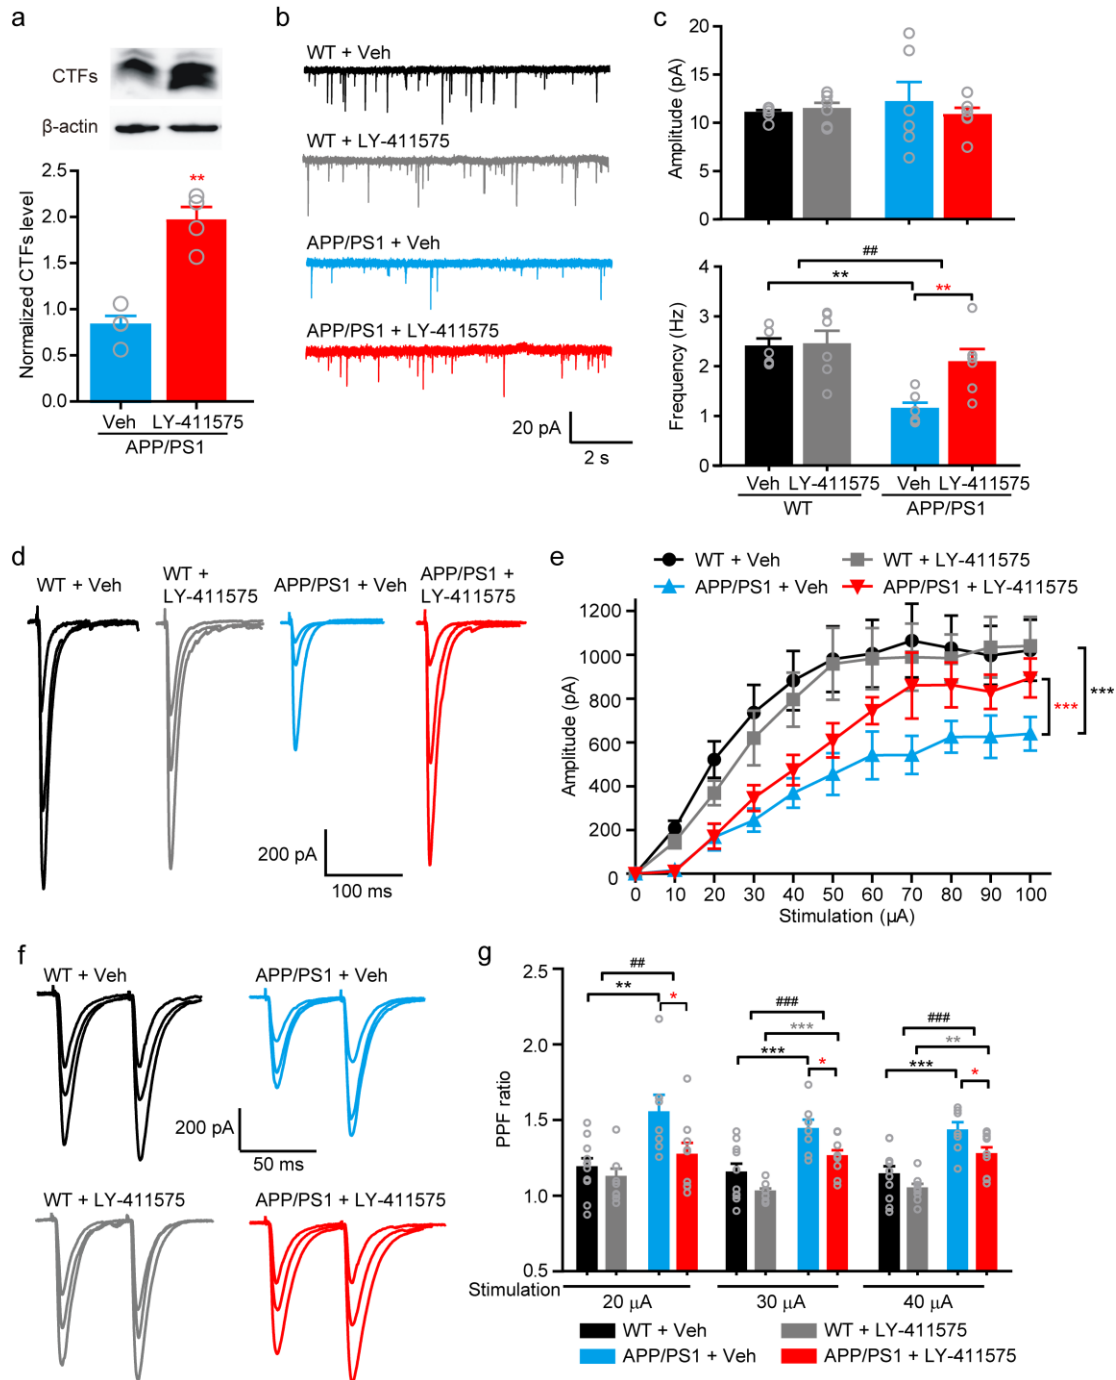

69

70 **Supplementary Figure 5** Reducing A $\beta$  production by  $\gamma$ -secretase inhibitor LY-411575

71 partially rescues excitatory synaptic deficits in 6-7-month-old APP/PS1 mice. **a**

72 Representative Western blots (upper) and quantification (bottom) of hippocampal

73 CTFs in APP/PS1 mice treated with vehicle (Veh) or LY-411575. *t* test; \*\*,  $P < 0.01$ ;  $N$

74 = 4 per group. **b, c** Representative traces (**b**) of mEPSCs in CA1 pyramidal neurons

75 and quantification (**c**) of mEPSC amplitude (upper) and frequency (bottom) in WT and  
76 APP/PS1 mice treated with vehicle (Veh) or LY-411575. Two-way ANOVA with post  
77 hoc Bonferroni test; upper panel in **c**: animal,  $F_{(1,29)} = 0.0391$ ,  $P = 0.845$ ; treatment,  
78  $F_{(1,29)} = 0.143$ ,  $P = 0.709$ ; bottom panel in **c**: animal,  $F_{(1,29)} = 12.814$ ,  $P = 0.002$ ;  
79 treatment,  $F_{(1,29)} = 4.733$ ,  $P = 0.040$ ; \*\*,  $P < 0.01$ ; ##,  $P < 0.01$  (APP/PS1 vs. WT);  $N =$   
80 5-6 per group. **d, e** Representative traces of SC-CA1 EPSCs evoked by stimulus  
81 intensities of 20, 30, and 100  $\mu\text{A}$  (**d**) and quantification of EPSC amplitude to stimulus  
82 intensity (**e**) in WT + Veh, WT + LY-411575, APP/PS1 + Veh, and APP/PS1 +  
83 LY-411575 groups. Two-way ANOVA with post hoc Bonferroni test; group,  $F_{(3,209)} =$   
84 38.257,  $P < 0.001$ ; stimulation,  $F_{(10,209)} = 46.014$ ,  $P < 0.001$ ; \*\*\*,  $P < 0.001$ ;  $N = 5-7$  per  
85 group. **f, g** Representative traces (**f**) and quantification (**g**) of PPF of SC-CA1 EPSCs  
86 evoked by stimulus intensities of 20, 30, and 40  $\mu\text{A}$  in WT and APP/PS1 mice treated  
87 with Veh, or LY-411575. Two-way ANOVA with post hoc Bonferroni test; 20  $\mu\text{A}$ : animal,  
88  $F_{(1,30)} = 11.471$ ,  $P = 0.002$ ; treatment,  $F_{(1,30)} = 5.540$ ,  $P = 0.025$ ; 30  $\mu\text{A}$ : animal,  $F_{(1,30)} =$   
89 26.206,  $P < 0.001$ ; treatment,  $F_{(1,30)} = 9.045$ ,  $P = 0.005$ ; 40  $\mu\text{A}$ : animal,  $F_{(1,30)} = 27.079$ ,  
90  $P < 0.001$ ; treatment,  $F_{(1,30)} = 6.278$ ,  $P = 0.018$ ; \*,  $P < 0.05$ ; \*\*,  $P < 0.01$ ; \*\*\*,  $P < 0.001$ ;  
91 ##,  $P < 0.01$ ; ###,  $P < 0.001$  (APP/PS1 vs. WT);  $N = 7-10$  per group. Data are mean  $\pm$   
92 SEM. Source data are provided as a Source Data file.

93



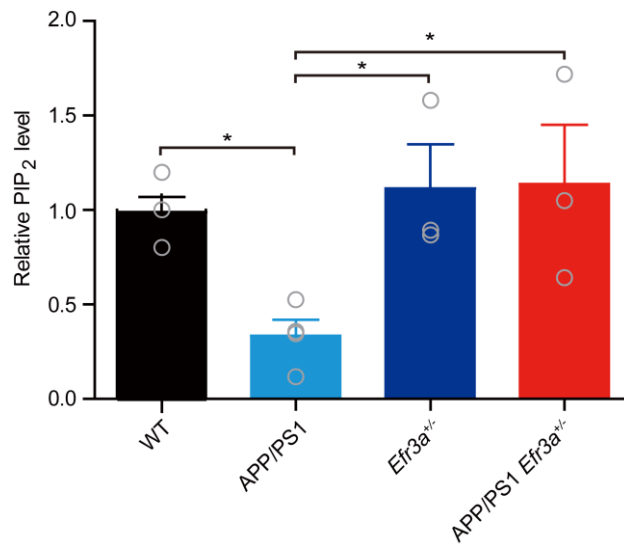

94

95

96 **Supplementary Figure 6** Halving *Efr3a* copy number restores the decreased PIP<sub>2</sub>

97 level measured with PIP<sub>2</sub> ELISA in APP/PS1 mice. One-way ANOVA with post hoc

98 Dunnett's test;  $F_{(3,10)} = 4.93$ ; \*,  $P < 0.05$ ;  $N = 3-4$  per group. Data are mean ± SEM.

99 Source data are provided as a Source Data file.

100

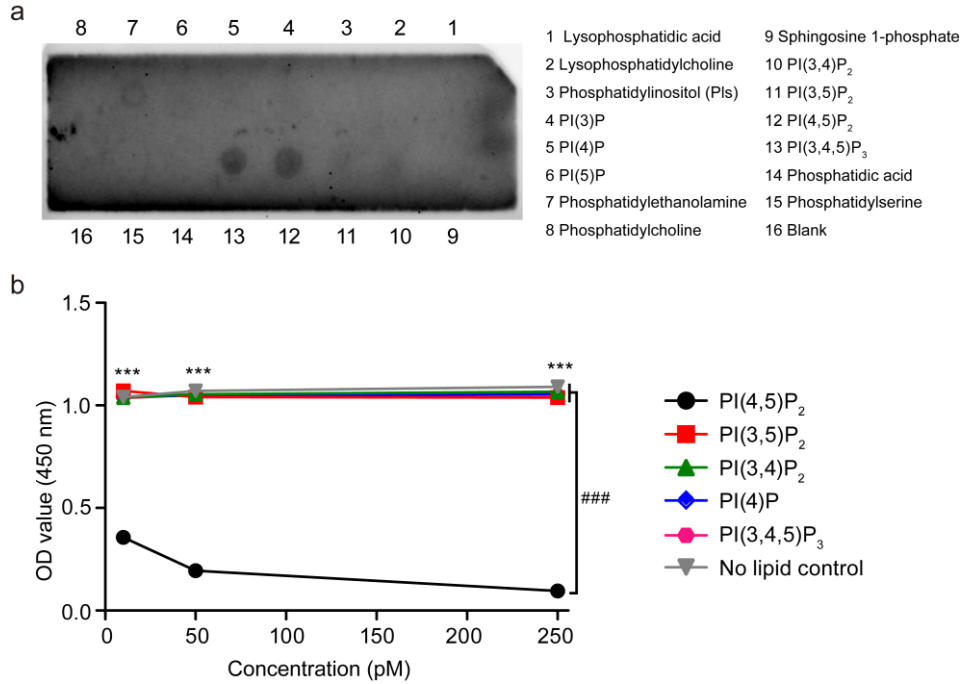

101

102

103 **Supplementary Figure 7** Anti-PI(4,5)P<sub>2</sub> antibody and ELISA kit specificities. **a**

104 Representative PIP strip showing the mouse anti-PI(4,5)P<sub>2</sub> antibody specifically

105 recognizes PI(4,5)P<sub>2</sub> and PI(3,4,5)P<sub>3</sub>. **b** Plot of colorimetric signals for various

106 phosphatidylinositol phosphates at concentrations of 10, 50, and 250 pM. Two-way

107 ANOVA with post hoc Bonferroni test; PIP species,  $F_{(5,45)} = 4634.6$ ,  $P < 0.001$ ; dose,

108  $F_{(2,45)} = 12.527$ ,  $P < 0.001$ ; \*\*\*,  $P < 0.001$ ; ###,  $P < 0.001$ ;  $N = 3-6$  per group. Data are

109 mean  $\pm$  SEM. Source data are provided as a Source Data file.

110

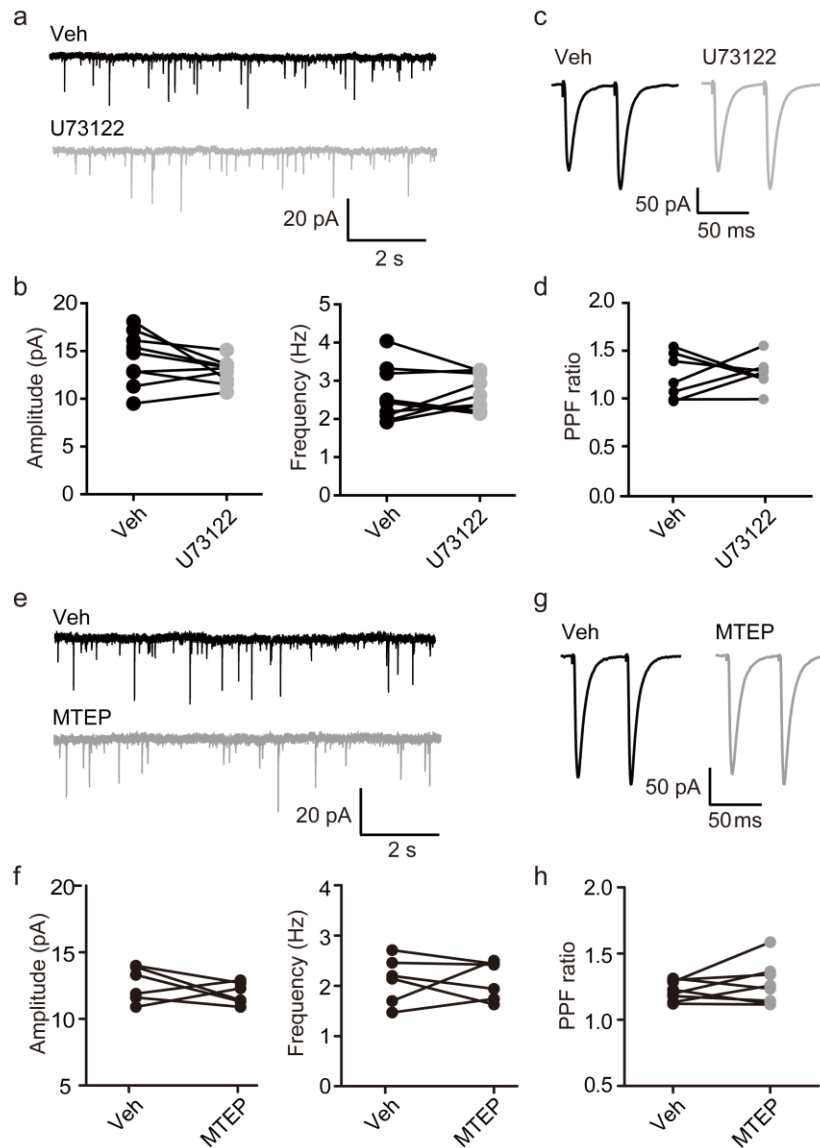

111

112

113 **Supplementary Figure 8** Inhibiting PLC or mGluR5 has no influence on mEPSCs in

114 CA1 pyramidal neurons and PPF at the SC-CA1 synapse in WT animals. **a, b**

115 Representative traces (**a**) of mEPSCs in CA1 pyramidal neurons and quantification (**b**)

116 of mEPSC amplitude (left) and frequency (right) in WT hippocampal slices before (Veh)

117 and after U73122 treatment. *t* test;  $P > 0.05$ ;  $N = 9$  per group. **c, d** Representative

118 traces (**c**) and quantification (**d**) of PPF of SC-CA1 EPSCs in WT mice before (Veh)

119 and after U73122 treatment. *t* test;  $P > 0.05$ ;  $N = 7$  per group. **e, f** Representative

120 traces (**e**) of mEPSCs in CA1 pyramidal neurons and quantification (**f**) of mEPSC  
121 amplitude (left) and frequency (right) in WT hippocampal slices before (Veh) and after  
122 MTEP treatment. *t* test; *P* > 0.05; *N* = 6 per group. **g, h** Representative traces (**g**) and  
123 quantification (**h**) of PPF of SC-CA1 EPSCs in WT mice before (Veh) and after MTEP  
124 treatment. *t* test; *P* > 0.05; *N* = 8 per group. Data are mean ± SEM. Source data are  
125 provided as a Source Data file.

126

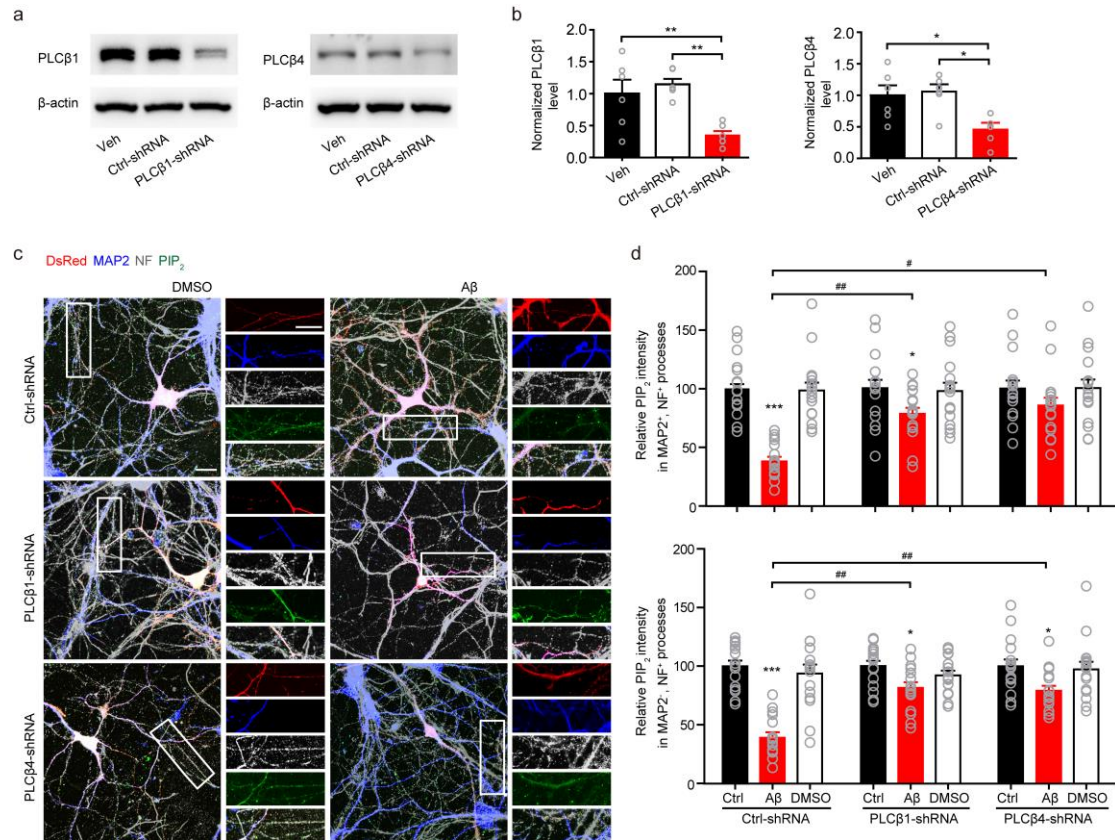

127

128

129 **Supplementary Figure 9** Knocking down PLCβ1 or PLCβ4 prevents oligomeric

130 Aβ-induced PIP<sub>2</sub> reduction in cultured hippocampal neurons. **a, b** Representative

131 Western blots (**a**) and quantification (**b**) of PLCβ1 (left) and PLCβ4 (right) in primary

132 hippocampal neurons treated with vehicle (Veh) or transfected with lentivirus carrying

133 control (Ctrl)-shRNA, PLCβ1-shRNA, or PLCβ4-shRNA. One-way ANOVA with post

134 hoc Dunnett's test;  $F_{(2,15)} = 9.190$  (**b, left**);  $F_{(2,14)} = 5.886$  (**b, right**); \*,  $P < 0.05$ ; \*\*,  $P <$

135  $0.01$ ;  $N = 5-6$  per group. **c** Confocal images of primary hippocampal neurons infected

136 with lentivirus carrying Ctrl-shRNA, PLCβ1-shRNA, or PLCβ4-shRNA showing the

137 effect of DMSO or Aβ treatment (blank Ctrl treatment not shown) on colocalization of

138 PIP<sub>2</sub>, MAP2, and neurofilament (NF) along neuronal processes. Bars, 20 μm. **d**

139 Quantification of relative PIP<sub>2</sub> intensity in dendrites (upper panel) and axons (bottom

140 panel) of lentiviral-infected, DsRed positive neurons. Two-way ANOVA with post hoc  
141 Bonferroni test; upper panel: cell type,  $F_{(2,144)} = 5.693$ ,  $P = 0.004$ ; treatment,  $F_{(2,144)} =$   
142  $25.666$ ,  $P < 0.001$ ; bottom panel: cell type,  $F_{(2,135)} = 6.999$ ,  $P < 0.001$ ; treatment,  $F_{(2,135)}$   
143  $= 33.85$ ,  $P < 0.001$  ; \*,  $P < 0.05$ ; \*\*\*,  $P < 0.001$  (compared with Ctrl treatment); #,  $P <$   
144  $0.05$ ; ##,  $P < 0.01$ ;  $N = 16-17$  per group. Data are mean  $\pm$  SEM. Source data are  
145 provided as a Source Data file.

146

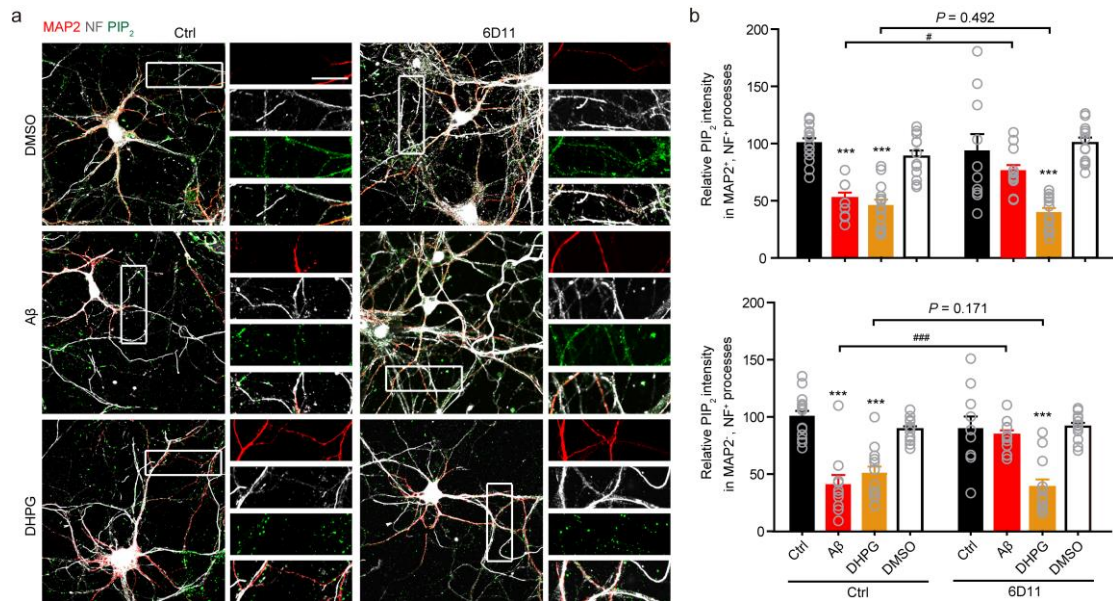

147

148

149 **Supplementary Figure 10** Blocking PrP<sup>C</sup> prevents oligomeric Aβ-induced PIP<sub>2</sub>

150 reduction in cultured hippocampal neurons. **a** Confocal images of cultured

151 hippocampal neurons blocked with medium containing anti-PrP<sup>C</sup> antibody 6D11 or

152 control (Ctrl) medium showing the effect of DMSO, oligomeric Aβ, or DHPG treatment

153 (blank Ctrl treatment not shown) on colocalization of PIP<sub>2</sub>, MAP2, and neurofilament

154 (NF) along neuronal processes. Bars, 20 μm. **b** Quantification of relative PIP<sub>2</sub> intensity

155 in dendrites (upper panel) and axons (bottom panel) showing 6D11 prevents Aβ-, but

156 not DHPG-induced suppression of PIP<sub>2</sub> in neurites. Two-way ANOVA with post hoc

157 Bonferroni test; upper panel: Ctrl/6D11,  $F_{(1,87)} = 1.596$ ,  $P = 0.21$ ; treatment,  $F_{(3,87)} =$

158  $32.585$ ,  $P < 0.001$ ; bottom panel: Ctrl/6D11,  $F_{(1,88)} = 1.650$ ,  $P = 0.202$ ; treatment,  $F_{(3,88)}$

159  $= 30.481$ ,  $P < 0.001$ ; \*\*\*,  $P < 0.001$  (compared with Ctrl-Ctrl or 6D11-Ctrl group); #,  $P <$

160  $0.05$ ; ###,  $P < 0.001$ ;  $N = 10-14$  per group. Data are mean  $\pm$  SEM. Source data are

161 provided as a Source Data file.

162

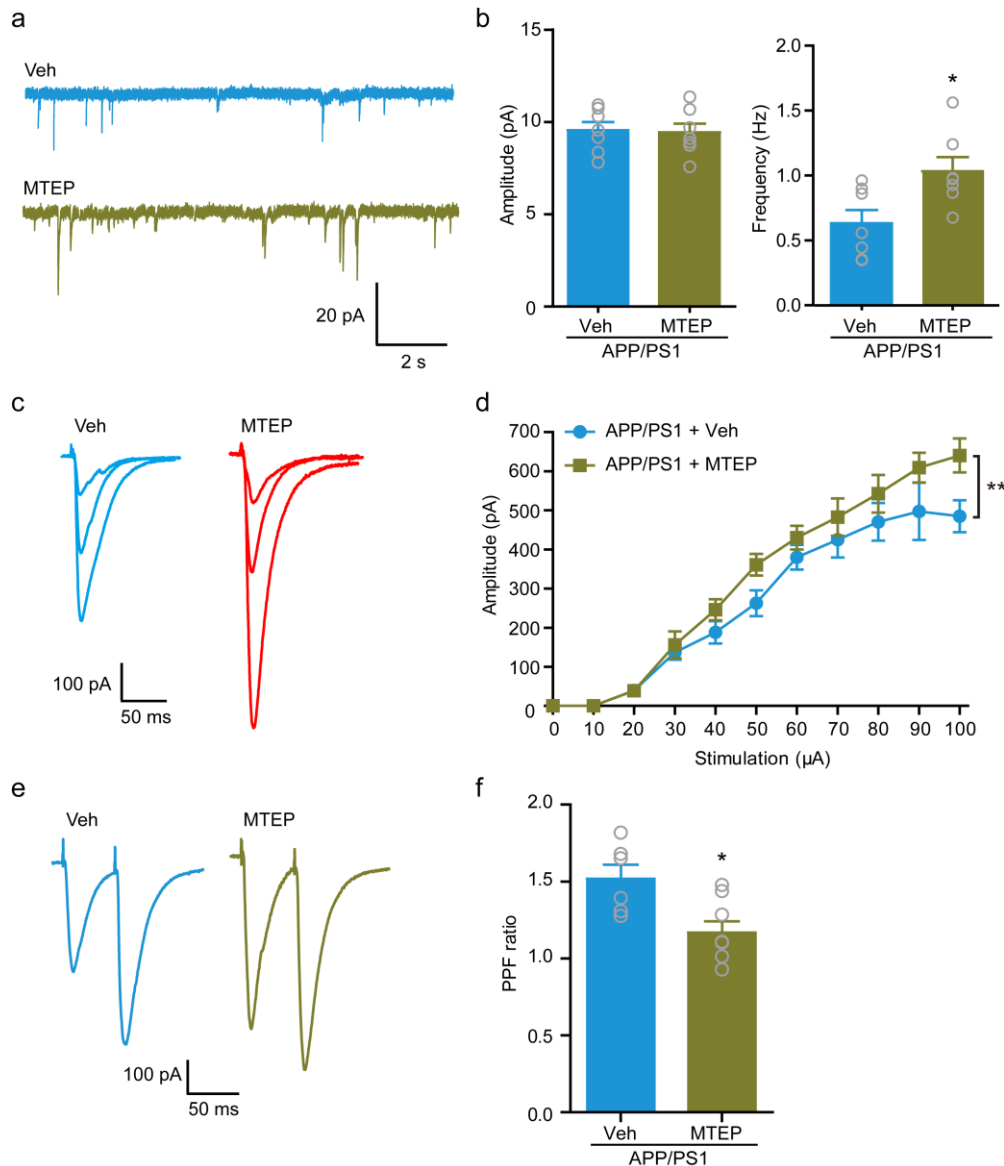

163

164 **Supplementary Figure 11** Blocking mGluR5 increases excitatory synaptic

165 transmission and decreases PPF in the hippocampus of 6-7-month-old APP/PS1

166 mice. **a, b** Representative traces (**a**) of mEPSCs in CA1 pyramidal neurons and

167 quantification (**b**) of mEPSC amplitude (left) and frequency (right) in hippocampal

168 slices of APP/PS1 mice treated with vehicle (Veh) or MTEP. *t* test; \*,  $P < 0.05$ ;  $N = 7$

169 per group. **c, d** Representative traces of SC-CA1 EPSCs evoked by stimulus

170 intensities of 30, 50, and 100  $\mu$ A (**c**) and quantification of EPSC amplitude to stimulus

171 intensity (**d**) in APP/PS1 hippocampal slices treated with Veh or MTEP. Two-way



172 ANOVA with post hoc Bonferroni test; treatment,  $F_{(1,88)} = 14.648$ ,  $P < 0.001$ ;  
173 stimulation,  $F_{(10,88)} = 81.036$ ,  $P < 0.001$ ; \*\*,  $P < 0.01$ ;  $N = 5$  per group. **e, f**  
174 Representative traces (**e**) and quantification (**f**) of PPF of SC-CA1 EPSCs in APP/PS1  
175 hippocampal slices treated with Veh or MTEP.  $t$  test; \*,  $P < 0.05$ ;  $N = 6-8$  per groups.  
176 Data are mean  $\pm$  SEM. Source data are provided as a Source Data file.  
177

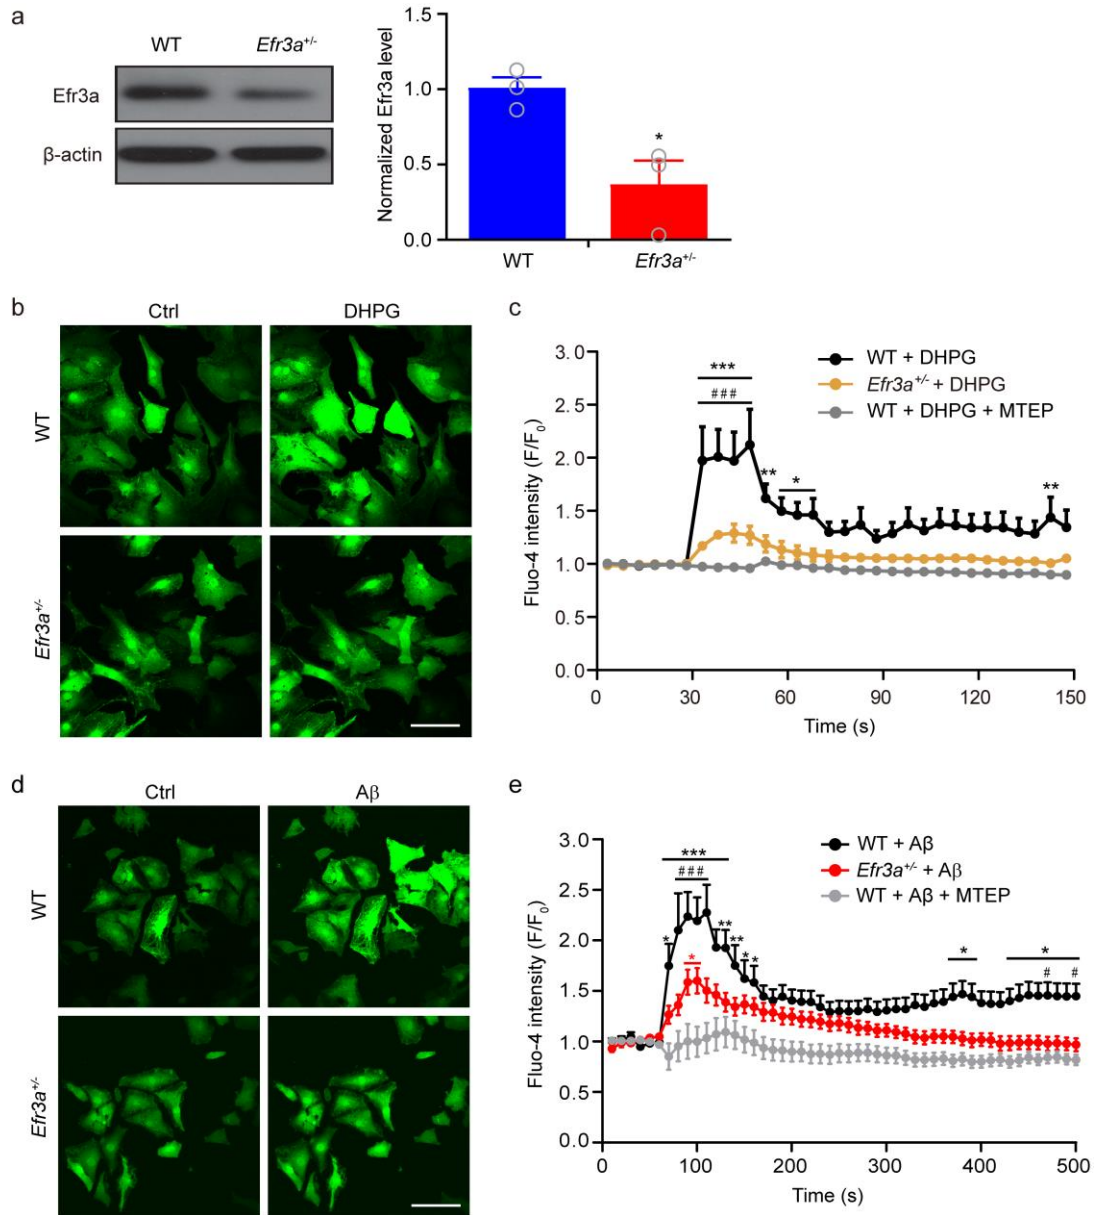

178

179

180 **Supplementary Figure 12** DHPG- or oligomeric Aβ-induced, mGluR5-mediated

181 increase in [Ca<sup>2+</sup>]<sub>i</sub> is downregulated by halving *Efr3a* copy number in astrocytes. **a**

182 Representative Western blots (left) and quantification (right) of Efr3a in the

183 hippocampus from WT and *Efr3a*<sup>+/-</sup> mice. *t* test; \*, *P* < 0.05; *N* = 3 per group. **b-e**

184 Confocal images of cultured astrocytes from WT and *Efr3a*<sup>+/-</sup> mice stained with fluo-4

185 (**b, d**) and the time course (**c, e**) of the relative astrocytic fluo-4 intensity (F/F<sub>0</sub>) in

186 response to control (Ctrl)/DHPG (**b, c**) or Ctrl/A $\beta$  (**d, e**) treatment. MTEP blocks  
187 DHPG- (**c**) or A $\beta$ -induced (**e**) Ca<sup>2+</sup> increase in astrocytes. Bars, 50  $\mu$ m. Two-way RM  
188 ANOVA with post hoc Bonferroni test; in **c**: group,  $F_{(2,1769)} = 13.509$ ,  $P < 0.001$ ; time,  
189  $F_{(58,1769)} = 5.354$ ,  $P < 0.001$ ; in **e**: group,  $F_{(2,2744)} = 11.457$ ,  $P < 0.001$ ; time,  $F_{(98,2744)} =$   
190  $2.833$ ,  $P < 0.001$ ; \*,  $P < 0.05$ ; \*\*,  $P < 0.01$ ; \*\*\*,  $P < 0.001$  (compared with MTEP  
191 groups in **c** and **e**); #,  $P < 0.05$ ; ###,  $P < 0.001$  (WT + DHPG vs. *Efr3a*<sup>+/-</sup> + DHPG group  
192 in **c**, WT + A $\beta$  vs. *Efr3a*<sup>+/-</sup> + A $\beta$  group in **d**);  $N = 12-25$  per group. Data are mean  $\pm$   
193 SEM. Source data are provided as a Source Data file.

194

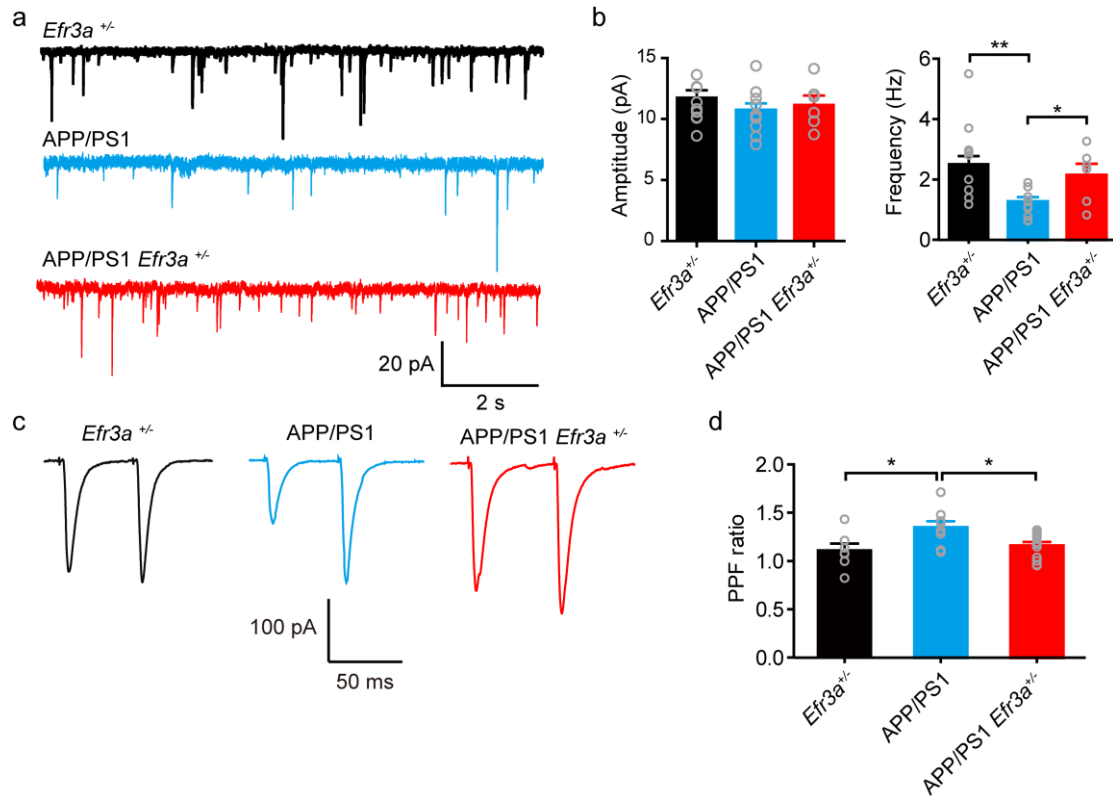

195

196 **Supplementary Figure 13** Halving *Efr3a* copy number ameliorates early excitatory

197 synaptic deficits in APP/PS1 mice. **a, b** Representative traces (**a**) of mEPSCs in CA1

198 pyramidal neurons and quantification (**b**) of mEPSC amplitude (left) and frequency

199 (right) in 6-7-month-old WT, APP/PS1, and APP/PS1 *Efr3a*<sup>+/-</sup> mice. One-way ANOVA

200 with post hoc Dunnett's test;  $F_{(2,24)} = 0.17$  (amplitude);  $F_{(2,24)} = 5.78$  (frequency); \*,  $P <$

201 0.05, \*\*,  $P < 0.01$ ;  $N = 6-11$  per group. **c, d** Representative traces (**c**) and

202 quantification (**d**) of PPF of SC-CA1 EPSCs in 6-7-month-old WT, APP/PS1, and

203 APP/PS1 *Efr3a*<sup>+/-</sup> mice. One-way ANOVA with post hoc Dunnett's test;  $F_{(2,25)} = 4.9$ ; \*,

204  $P < 0.05$ ;  $N = 7-12$  per group. Data are mean  $\pm$  SEM. Source data are provided as a

205 Source Data file.

206

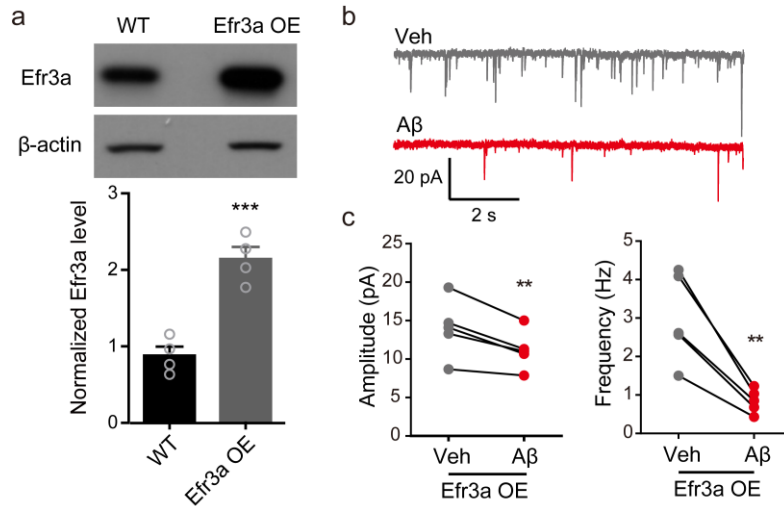

207

208

209 **Supplementary Figure 14** Overexpression of *Efr3a* causes a more robust inhibition

210 of mEPSC frequency in CA1 pyramidal neurons treated with oligomeric  $A\beta$ . **a**

211 Representative Western blots of Efr3a (top) and quantification of Efr3a expression

212 (bottom) in the hippocampus from WT and Efr3a overexpression (OE) mice. *t* test; \*\*\*,

213  $P < 0.001$ ;  $N = 4$  per group. **b, c** Representative traces (**b**) of mEPSCs in CA1

214 pyramidal neurons and quantification (**c**) of mEPSC amplitude (left) and frequency

215 (right) in hippocampal slices from Efr3a OE mice before (Veh) and after oligomeric

216  $A\beta_{42}$  (400 nM) treatment. *t* test; \*\*,  $P < 0.01$ ;  $N = 5$  per group. Data are mean  $\pm$  SEM.

217 Source data are provided as a Source Data file.

218

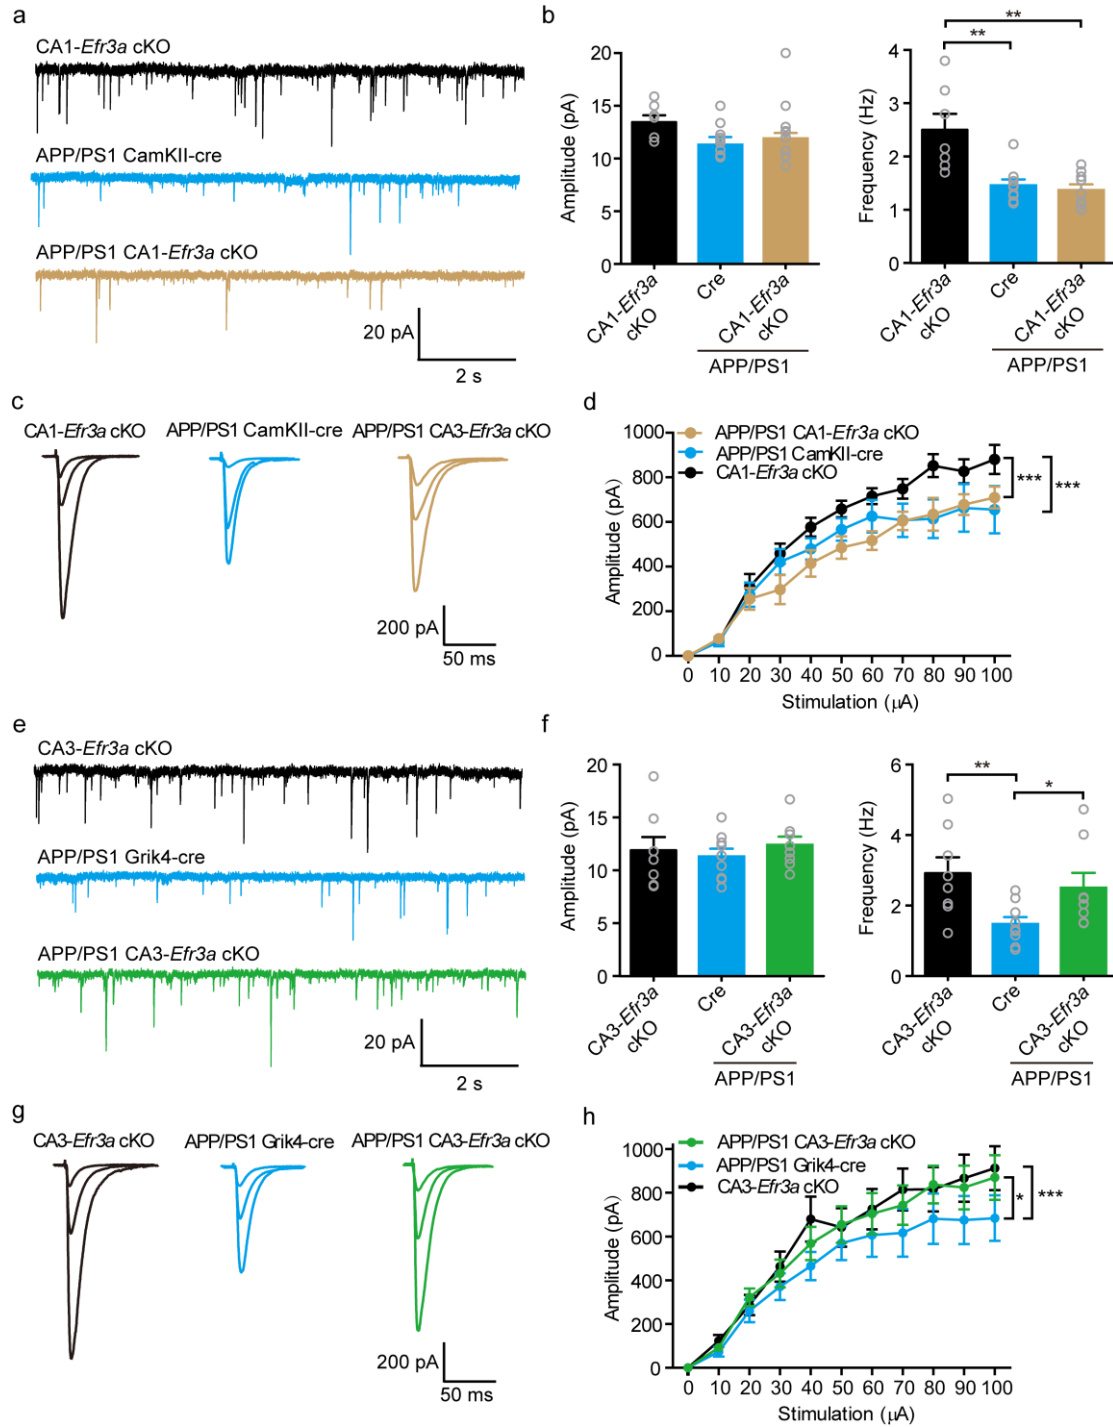

219

220

221 **Supplementary Figure 15** Selectively knocking out *Efr3a* in CA3 area recues

222 excitatory transmission deficits in APP/PS1 mice. **a, b** Representative traces (**a**) of

223 mEPSCs in CA1 pyramidal neurons and quantification (**b**) of mEPSC amplitude (left)

224 and frequency (right) in 6-7-month-old CA1-*Efr3a* cKO, APP/PS1 CamKII-cre, and

225 APP/PS1 CA1-*Efr3a* cKO mice. One-way ANOVA with post hoc Dunnett's test;  $F_{(2,22)} =$   
226 0.9 (amplitude);  $F_{(2,22)} = 11.8$  (frequency); \*\*,  $P < 0.01$ ;  $N = 7-9$  per group. **c, d**  
227 Representative traces of SC-CA1 EPSCs evoked by stimulus intensities of 10, 20,  
228 and 100  $\mu\text{A}$  (**c**) and quantification of EPSC amplitude to stimulus intensity (**d**) in  
229 6-7-month-old CA1-*Efr3a* cKO, APP/PS1 CamKII-cre, and APP/PS1 CA1-*Efr3a* cKO  
230 mice. Two-way ANOVA with post hoc Bonferroni test; animal,  $F_{(2,176)} = 16.957$ ,  $P <$   
231 0.001; stimulation,  $F_{(10,176)} = 68.471$ ,  $P < 0.001$ ; \*\*\*,  $P < 0.001$ ;  $N = 6-7$  per group. **e, f**  
232 Representative traces (**e**) of mEPSCs in CA1 pyramidal neurons and quantification (**f**)  
233 of mEPSC amplitude (left) and frequency (right) in 6-7-month-old CA3-*Efr3a* cKO,  
234 APP/PS1 Grik4-cre, and APP/PS1 CA3-*Efr3a* cKO mice. One-way ANOVA with post  
235 hoc Dunnett's test;  $F_{(2,22)} = 0.35$  (amplitude);  $F_{(2,22)} = 4.32$  (frequency); \*,  $P < 0.05$ ; \*\*,   
236  $P < 0.01$ ;  $N = 8-9$  per group. **g, h** Representative traces of SC-CA1 EPSCs evoked by  
237 stimulus intensities of 10, 30, and 100  $\mu\text{A}$  (**g**) and quantification of EPSC amplitude to  
238 stimulus intensity (**h**) in 6-7-month-old CA3-*Efr3a* cKO, APP/PS1 Grik4-cre, and  
239 APP/PS1 CA3-*Efr3a* cKO mice. Two-way ANOVA with post hoc Bonferroni test;  
240 animal,  $F_{(2,176)} = 7.037$ ,  $P = 0.001$ ; stimulation,  $F_{(10,176)} = 32.706$ ,  $P < 0.001$ ; \*,  $P < 0.05$ ;  
241 \*\*\*,  $P < 0.001$ ;  $N = 6-7$  per group. Data are mean  $\pm$  SEM. Source data are provided as  
242 a Source Data file.

243

244 **Supplementary Table 1.** The primers used in the study. TA, the optimal Annealing  
 245 Temperature.

| Primer name |                 | Sequence                    | TA   |
|-------------|-----------------|-----------------------------|------|
| Efr3a flox  | Efr3a_LoxP1-1-F | GCAGGACCACTGTTTTGGCTGC      | 64°C |
|             | Efr3a_LoxP1-1-R | AGCCAGGGATGCGACTCATGA       |      |
| Efr3a KO    | Efr3a_KO-1-F    | TTATTTAGTATGTTGGACGAG       | 56°C |
|             | Efr3a_KO-1-R    | AACATGGAGGTTAAGTTTGT        |      |
| Efr3a KI    | Efr3a_OE-1-F    | CACTTGTAAGGAGTGGTGAAGGACCA  | 64°C |
|             | Efr3a_OE-1-R    | ATTGTGCAAGGCCCTGGGCTTAAT    |      |
| Grik4-Cre   | Grik4-Cre-F     | GCGGTCTGGCAGTAAAACTATC      | 59°C |
|             | Grik4-Cre-R     | GTGAAACAGCATTGCTGTCACTT     |      |
| CamK2a-Cre  | CamK2a-Cre-F    | GACAGGCAGGCCTTCTCTGAA       | 61°C |
|             | CamK2a-Cre-R    | CTTCTCCACACCAGCTGTGGA       |      |
| APP/PS1     | PSEN1dE9-F      | GTGGATAACCCCTCCCCAGCCTAGACC | 64°C |
|             | PSEN1dE9-R      | AATAGAGAACGGCAGGAGCA        |      |
|             | APP-F           | GACTGACCACTCGACCAGGTTCTG    | 64°C |
|             | APP-R           | CTTGTAAGTTGGATTCTCATATCCG   |      |
| 5xFAD       | oIMR 3610-F     | AGGACTGACCACTCGACCAG        | 54°C |
|             | oIMR 3611-R     | CGGGGGTCTAGTTCTGCAT         |      |
|             | oIMR 1644-F     | AATAGAGAACGGCAGGAGCA        | 54°C |



|       |             |                             |      |
|-------|-------------|-----------------------------|------|
|       | oIMR 1645-R | GCCATGAGGGCACTAATCAT        |      |
| M146V | oIMR 1586-F | AGGCAGGAAGATCACGTGTTCAAGTAC | 69°C |
|       | oIMR 1587-R | CACACGCACACTCTGACATGCACAGGC |      |

246

247

248 **Supplementary Table 2.** The drugs used in the study.

| <b>Reagents</b>                      | <b>Company</b>           | <b>Catalogue Number</b> |
|--------------------------------------|--------------------------|-------------------------|
| Tetrodotoxin                         | Abcam                    | ab120054                |
| Bicuculline                          | Abcam                    | ab120108                |
| $\beta$ -amyloid <sub>42</sub>       | Thermo fisher scientific | 1764958A                |
| Mg-ATP                               | Sigma-Aldrich            | P9187                   |
| Tris-GTP                             | Sigma-Aldrich            | G9002                   |
| QX-314                               | Abcam                    | ab120117                |
| Phosphocreatine di(tris) salt        | Sigma-Aldrich            | P1937                   |
| Tamoxifen                            | Sigma-Aldrich            | T5648                   |
| PI(4,5)P <sub>2</sub> MASS ELISA KIT | Echelon Bioscience       | K-4500                  |
| HFIP                                 | Sigma-Aldrich            | 52517                   |
| DMSO                                 | Sigma-Aldrich            | D8418                   |
| DNQX                                 | Abcam                    | ab120018                |
| D-AP5                                | Abcam                    | ab120003                |
| FM 1–43                              | Biotium                  | 70030                   |
| ADVASEP-7                            | Biotium                  | 70029                   |
| Fluo-4                               | Thermo fisher scientific | 14201                   |
| DHPG                                 | Abcam                    | ab120007                |
| MTEP                                 | Abcam                    | ab144307                |
| U73122                               | Abcam                    | ab120998                |

|                                                   |                          |             |
|---------------------------------------------------|--------------------------|-------------|
| PI(4,5)P <sub>2</sub> diC8                        | Echelon Bioscience       | P-4508      |
| PI4P diC16                                        | Echelon Bioscience       | P-4016      |
| PI(3,4)P <sub>2</sub> diC16                       | Echelon Bioscience       | P-3416      |
| PI(3,5)P <sub>2</sub> diC16                       | Echelon Bioscience       | P-3516      |
| PI(3,4,5)P <sub>3</sub> diC16                     | Echelon Bioscience       | P-3916      |
| Sunflower oil                                     | Sigma-Aldrich            | S5007       |
| Acrylamide                                        | Shenggong (China)        | A1032       |
| N,N'-MethyleneBisacrylamide                       | Sigma-Aldrich            | M7279       |
| West Pico                                         | Pierce                   | 34078       |
| West Femto                                        | Pierce                   | 34095       |
| Ammonium Persulfate                               | Sigma-Aldrich            | A3678       |
| TEMED                                             | Sigma-Aldrich            | T9281       |
| Glycine                                           | Biosharp (China)         | 56-40-6     |
| SDS                                               | Sigma-Aldrich            | L4390       |
| Tris-Base                                         | Sigma-Aldrich            | T1503       |
| Albumin bovine V (BSA)                            | BIOSHARP                 | Amresco0332 |
| Skim milk powder                                  | BIOFROX                  | 1172GR100   |
| Albumin from chicken egg white powder (Ovalbumin) | Sigma-Aldrich            | A5253       |
| Gelatin                                           | Shenggong (China)        | G9764       |
| Neurobasal medium                                 | Thermo fisher scientific | 21103-049   |

|                          |                          |           |
|--------------------------|--------------------------|-----------|
| Fetal bovine serum (FBS) | Thermo fisher scientific | 10099-141 |
| GlutaMax™                | Thermo fisher scientific | 35050-061 |
| LY-411575                | Sigma-Aldrich            | SML0506   |

249

250 **Supplementary methods**

251 **Animals**

252 All procedures were carried out in accordance with the National Institutes of Health  
253 Guidelines for the Care and Use of Laboratory Animals and were approved by the  
254 Animal Advisory Committee at Zhejiang University. *Efr3a* double-flox (*Efr3a<sup>fl/fl</sup>*) mice  
255 were generated as reported by Qian et al.<sup>1</sup> , and *Efr3a<sup>+/-</sup>* heterozygotes were  
256 generated by breeding *Efr3a<sup>fl/fl</sup>* mice to Ella-cre mice as described in a previous report<sup>2</sup>.  
257 B6 (stock number 000664), APP/PS1 double-transgenic [B6.Cg-Tg  
258 (APP<sup>swe</sup>,PSEN1<sup>dE9</sup>)85Dbo/Mmjax, stock number 34832], 5xFAD  
259 [B6.Cg-Tg(APP<sup>S</sup>wFILon,PSEN1\*<sup>M146L</sup>\*<sup>L286V</sup>)6799Vas/Mmjax, stock number  
260 34848], PS1M146VKI [B6.129-Psen1<sup>tm1Mpm</sup>/J stock number 004193], Grik4-cre  
261 [C57BL/6-Tg(Grik4-cre)G32-4Stl/J, stock number 006474], and Camk2a-creERT2  
262 [B6;129S6-Tg(Camk2a-cre/ERT2)1Aibs/J, stock number 012362] mice were  
263 purchased from The Jackson Laboratory (Bar Harbor, ME). *Efr3a<sup>fl/fl</sup>*, *Efr3a<sup>fl/fl</sup>*-Grik4-cre,  
264 *Efr3a<sup>fl/fl</sup>*-Camk2a-creERT2, APP/PS1-*Efr3a<sup>fl/fl</sup>*-Grik4-cre, APP/PS1-Grik4-cre,  
265 APP/PS1-*Efr3a<sup>fl/fl</sup>*-Camk2a-creERT2, and APP/PS1-Camk2a-creERT2 animals were  
266 obtained by heterozygous mating. The transgenic strain overexpressing Efr3a was  
267 generated with a BAC transgenic construct containing the genomic DNA of *Efr3a*

268 carrying the miss sense mutation of S356A. Tamoxifen was intraperitoneally (i.p.)  
269 injected once a day for 5 consecutive days at a dose of 100 mg per kg to induce cre  
270 recombinase expression in the creER lines. *Efr3a*<sup>+/-</sup> mice embryos for primary neuron  
271 and astrocyte cultures were obtained from mating *Efr3a*<sup>+/-</sup> to B6 WT mice. All mice  
272 were housed at the Animal Facility of Zhejiang University under a 12-h light/dark cycle  
273 and had access to food and water ad libitum. For behavioral experiments, only male  
274 mice were used. The mouse genotypes were identified by PCR using genomic DNA  
275 from mouse tails and embryo tissues. The primers information can be found in  
276 Supplementary Table 1.

277 To inhibit  $\gamma$ -secretase, we treated mice with LY-411575 (SML0506, Sigma-Aldrich).  
278 LY-411575 was dissolved in DMSO at 100 mg per ml, and was then emulsified in  
279 sunflower oil (S5007, Sigma-Aldrich) at 1 mg per ml.  $\gamma$ -secretase inhibitor treatment  
280 was carried out as previously described<sup>3</sup>. Briefly, mice were injected subcutaneously  
281 once daily for 2 days with 3 mg per kg LY-411575 or vehicle (sunflower oil). 8 to 10 h  
282 after the injection, mice were sacrificed for electrophysiology recording.

### 283 **Antibodies and drugs**

284 The following commercially available antibodies were used: rabbit anti-amyloid  
285 precursor protein/C-terminal fragments (anti-CTFs, A8717, Sigma-Aldrich, 1:6000),  
286 purified mouse anti- $\beta$ -Amyloid, 1-16 (6E10, 803003, Biolegend; 1:1000 for Western  
287 blot; 2  $\mu$ g per ml for slice recordings as previously reported<sup>4, 5</sup>), rabbit anti-Efr3a  
288 (HPA023402, Sigma-Aldrich, 1:1000), mouse anti-PLC $\beta$ 1, D-8 (sc-5291, Santa Cruz,  
289 1:200), mouse anti-PLC $\beta$ 4, A-8 (sc-16613, Santa Cruz, 1:100), mouse anti- $\beta$ -actin

290 (TA-09, ZSGB-BIO, 1:20000), and HRP-conjugated secondary antibodies [(Goat  
291 anti-rabbit IgG (H+L), 31460, 1:20000; goat anti-mouse IgG (H+L), 31430, 1:20000;  
292 Thermo fisher scientific); goat anti-mouse IgG (H+L), 70-GAM007, Multi Sciences,  
293 1:5000] were used in Western blotting; mouse anti-PIP<sub>2</sub> antibody (ab11039, Abcam,  
294 1:200), chicken anti-neurofilament-L (anti-NF, CH22105, Neuromics, 1:250), rabbit  
295 anti-MAP2 antibody (ab32454, Abcam, 1:8000), rabbit anti-mGluR5 (extracellular)  
296 (AGC-007, Alomone labs, 1:50), mouse anti-MAP2 (M4403, Sigma-Aldrich, 1:1000),  
297 purified anti-CD230 (Prion) antibody (6D11, 808001, Biolegend, 5 µg per ml), and  
298 Alexa Fluor-conjugated secondary antibodies [488 donkey anti-rabbit (A-21206), 546  
299 donkey anti-mouse (A-10036), 546 donkey anti-rabbit (A-10040) (all from Thermo  
300 fisher scientific, 1:1000), 405 goat anti-rabbit IgG H&L (ab175654, Abcam, 1:500),  
301 488 goat anti-mouse IgM mu chain (ab150121, Abcam, 1:500), and 647 goat  
302 anti-chicken IgY H&L (ab150175, Abcam, 1:1000)] were used in  
303 immunocytochemistry.

304 To prepare oligomeric Aβ<sub>42</sub><sup>6</sup>, the Aβ<sub>42</sub> lyophilized powder (03112, Thermo Fisher  
305 Scientific) was first suspended in 100% 1,1,1,3,3,3-hexafluoro-2-propanol (HFIP,  
306 52517, Sigma-Aldrich) at a concentration of 1 mM. The Aβ<sub>42</sub>-HFIP solution was then  
307 incubated in polypropylene vials for complete solubilization at room temperature (RT)  
308 for 2 h. HFIP was allowed to evaporate under a slight stream of nitrogen until a clear  
309 peptide film was observed at the bottom of the vials. The vials were stored at -80°C  
310 until use. Twelve hours before experiments, the film was re-suspended by adding  
311 DMSO (D8418, Sigma-Aldrich) at a concentration of 5 mM and sonicated at RT for 10

312 min. The A $\beta$ <sub>42</sub>-DMSO solution was diluted 12 times in sterile PBS or culture medium  
313 and incubated at 4°C for 12 h. Following a 5 min centrifugation at 14,000 g, the  
314 concentration of the supernatant (~ 100  $\mu$ g per ml) was determined by a microplate  
315 reader (SpectraMax 190, Molecular Devices) and the oligomeric A $\beta$ <sub>42</sub> solution was  
316 diluted to 400 nM (based on monomeric A $\beta$ <sub>42</sub>) accordingly. To prepare fibrillar A $\beta$ <sub>42</sub>, the  
317 A $\beta$ <sub>42</sub>-DMSO solution was diluted 12 times in 10 mM HCl and incubated for 24 h at  
318 37°C.

319 Tamoxifen (T5648, Sigma-Aldrich) was dissolved in 100% ethanol at 100 mg per  
320 ml, and then was emulsified in sunflower oil (S5007, Sigma-Aldrich) at 10 mg per ml  
321 and vortexed for 5-10 min until the solution was clear. The stock solution was  
322 aliquoted and stored at -20°C. For slice recordings, PI(4,5)P<sub>2</sub> diC8 (PIP<sub>2</sub>, P-4508,  
323 Echelon Bioscience) was dissolved in the electrode solution at final concentration of  
324 200  $\mu$ M. For ELISA assay, PI(4,5)P<sub>2</sub> diC8, PI4P diC16 (P4016), PI(3,4)P<sub>2</sub> diC16  
325 (P-3416), PI(3,5)P<sub>2</sub> diC16 (P-3516), and PI(3,4,5)P<sub>3</sub> diC16 (P3916; all from Echelon  
326 Bioscience) were dissolved in PBS containing 0.25% Protein Stabilizer (PBS  
327 0.25%PS) at final concentrations of 10, 50, and 250  $\mu$ M. DHPG (ab120007, Abcam)  
328 was dissolved in the bath solution or culture medium and applied at a final  
329 concentration of 50  $\mu$ M. MTEP (ab144307, Abcam) and U73122 (ab120998, Abcam)  
330 were dissolved in DMSO and applied to the bath solution or culture medium at a final  
331 concentration of 10  $\mu$ M. In the Ca<sup>2+</sup> imaging experiment, DHPG was applied at a final  
332 concentration of 100  $\mu$ M. Drugs were added in the ACSF perfusate in slice recording  
333 experiments and in the culture medium 24 h before various experiments performed on

334 cell cultures. The final concentrations of DMSO did not exceed 0.1% throughout the  
335 study. Drugs used in the study are described in Supplementary Table 2.

### 336 **Golgi staining**

337 Golgi stainings were carried out using an FD Rapid GolgiStain Kit (PK401, FD  
338 NeuroTechnologies) according to the manufacturer's instructions<sup>7</sup>. In brief,  
339 nonperfused mouse (WT and APP/PS1; 6-7-month-old) brains were immersed in  
340 impregnation solution for 2 weeks, and then transferred to "Solution C" for 2 days.  
341 Sections of 200  $\mu\text{m}$  thickness were serially cut with a freezing microtome (CM30503,  
342 Leica). Sections were mounted on 3% gelatin-coated slides and allowed to dry for 2  
343 weeks before being stained with silver nitrate solution "Solution D and E", dehydrated  
344 through descending alcohol series, and mounted with Permount. Images were  
345 acquired with an Olympus BX53 microscope at RT, and neuronal morphology analysis  
346 was performed using the NIH ImageJ software. At least 5 pyramidal neurons in the  
347 hippocampal CA1 region per mouse were randomly selected. The density of dendritic  
348 spines of a distinct branch was measured by a 100X oil-immersion objective  
349 (numerical aperture 1.3). Spines visible along both sides of dendritic segments were  
350 counted and expressed as mean number of spines per micrometer. Student t-test was  
351 used to determine significant levels between the WT and APP/PS1 groups.

### 352 **Slice recording**

353 Hippocampal brain slices were prepared from 4- or 6-7-month-old mice. For  
354 whole-cell recordings, mice were anesthetized with isoflurane and brains were  
355 dissected rapidly and immersed in ice-cold and oxygenated (95% O<sub>2</sub> / 5% CO<sub>2</sub>) ACSF



356 (in mM: 124 NaCl, 2 KCl, 2 MgSO<sub>4</sub>, 1.25 KH<sub>2</sub>PO<sub>4</sub>, 2 CaCl<sub>2</sub>, 26 NaHCO<sub>3</sub>, 10 D-glucose,  
357 pH 7.4, 300 mOsm). Transverse slices of hippocampus (300 μm) were cut with a  
358 tissue slicer (VT 1200S, Leica) in oxygenated ACSF. Slices were allowed to recover  
359 ~12 min in ACSF with low Na<sup>+</sup> and Ca<sup>2+</sup> concentrations (in mM: 110  
360 N-methyl-D-glucamine, 110 HCl, 2.5 KCl, 1.2 NH<sub>2</sub>PO<sub>4</sub>, 10 MgSO<sub>4</sub>, 0.5 CaCl<sub>2</sub>, 25  
361 NaHCO<sub>3</sub>, 25 D-glucose, pH 7.4, 300 mOsm) at 32°C, and subsequently in normal  
362 ACSF for 1 h at RT. For fEPSP recordings, mouse brains were dissected rapidly and  
363 immersed in ice-cold and oxygenated cutting solutions (in mM: 234 Sucrose, 5 KCl,  
364 1.25 NaH<sub>2</sub>PO<sub>4</sub>, 5 MgSO<sub>4</sub>, 26 NaHCO<sub>3</sub>, 25 Dextrose, 1 CaCl<sub>2</sub>, balanced with 95% O<sub>2</sub> /  
365 5% O<sub>2</sub>). Transverse brain slices (350 μm) containing the hippocampus were  
366 incubated in oxygenated ACSF and were allowed to recover ~25 min in ACSF at 32°C,  
367 and subsequently for ≥ 1 h at RT.

368 Whole-cell recordings were performed as previously described<sup>7, 8</sup>. Hippocampal  
369 slices were transferred to the recording chamber at 32°C and perfused continuously  
370 with ACSF bubbled with 95% O<sub>2</sub> / 5% CO<sub>2</sub> to ensure adequate oxygenation of slices.  
371 CA1 pyramidal neurons were identified under infrared differential interference contrast  
372 (IR-DIC) optics based on their location and morphology. Borosilicate glass (Sutter  
373 instruments) pipettes (3 - 5 MΩ) were pulled with a horizontal pipette puller (P97,  
374 Sutter instruments) and were filled with artificial intracellular fluid (in mM: 100  
375 CsCH<sub>3</sub>SO<sub>3</sub>, 20 KCl, 10 HEPES, 4 Mg-ATP, 0.3 Tris-GTP, 7 Tris<sub>2</sub>-Phosphocreatine, 3  
376 QX-314; pH 7.3, 285-290 mOsm). Pipettes were connected to the headstage of a  
377 Heka EPC 10 amplifier (Heka Elektronik), and fast and slow capacitances as well as

378 series resistance compensations were carefully adjusted. Liquid junction potentials  
379 were not corrected. mEPSC signals were recorded at -70 mV in ACSF containing 0.5  
380  $\mu\text{M}$  tetrodotoxin (TTX; Abcam) and 10  $\mu\text{M}$  bicuculline (Abcam). Series resistance was  
381 normally less than 20 M $\Omega$  and recordings exceeding 20% change in series resistance  
382 were terminated and discarded. Recordings were filtered at 2.0 kHz and digitized at  
383 10 kHz.

384 Evoked EPSCs were elicited in the presence of 10  $\mu\text{M}$  bicuculline using a bipolar  
385 stimulating electrode (CE2C75, FHC Inc.) placed in stratum radiatum 300  $\mu\text{m}$  away  
386 from the recording site. The rectangle current pulses (duration: 180  $\mu\text{s}$ , frequency: 0.1  
387 Hz) were delivered via a constant-current stimulator (SIU91A, Cygnus Technology).  
388 PPF experiments were carried out by delivering a pair of stimuli with an interval of 50  
389 ms. PPF was assessed by the paired-pulse ratio (the second EPSC amplitude / the  
390 first EPSC amplitude). To estimate the RRP size and release probability, a repeated  
391 (10-20 repeats, 0.033 Hz) 20 Hz train stimulation (40 stimuli) protocol was used to  
392 evoke 40 EPSCs. To effectively discharge the RRP, a slightly higher stimulation  
393 intensity than the minimal stimulation was used to give about 5% failures. The RRP  
394 size was calculated by linear interpolating the linear portion of the cumulative EPSC  
395 amplitude plot to virtual stimulus 0. The release probability was calculated as  
396 the mean amplitude of the 1st EPSC during the repeated train stimulations divided by  
397 the RRP size.

398 Field EPSPs were elicited by stimulating the SC and recording with a borosilicate  
399 glass electrode filled with ACSF placed in CA1 stratum radiatum. Baseline and tetanic

400 stimulations were delivered by a bipolar stimulating electrode (CE2C75, FHC Inc.)  
401 placed 200 - 300  $\mu\text{m}$  away from the recording electrode. To record baseline  
402 responses before LTP induction, the intensity of each stimulus was adjusted to evoke  
403 fEPSPs with an amplitude 30 - 50% of the maximum. We also adjusted the amplitude  
404 of the baseline fEPSPs in control groups to match that in groups with reduced fEPSPs.  
405 Baseline fEPSPs were evoked at 0.05 Hz and recorded for at least 20 min (response  
406 variability < 10%). Three bursts of 20 pulses at 100 Hz separated by 1.5 s were  
407 delivered to induce LTP as previously described<sup>7</sup>. We recorded LTP in at least 7 slices  
408 from 3 - 4 mice for each group. Field EPSPs were recorded, filtered (1 kHz), and  
409 sampled (20 kHz) by a Heka EPC 10 amplifier.

410 To investigate synthetic A $\beta$ -induced alterations in mEPSCs, evoked EPSCs, and  
411 short- and long-term plasticity, we perfused hippocampal slices with A $\beta$ -containing  
412 ACSF for at least 20 min before acquiring data, unless the time course data were  
413 taken.

#### 414 **Cell culture**

415 Primary hippocampal neuron cultures were prepared from embryonic day 18 (E18)  
416 mice<sup>7</sup>. Briefly, embryos were removed from maternal mice anesthetized with  
417 isoflurane and euthanized by decapitation. Hippocampi were dissected and placed in  
418 Ca<sup>2+</sup>- and Mg<sup>2+</sup>-free HEPES-buffered Hank's balanced salt solution (HBSS; pH 7.45),  
419 followed by a digestion with 0.25% w/v trypsin. After trituration through a Pasteur  
420 pipette, neurons were centrifuged (1000 g for 5 min) and resuspended in Neurobasal  
421 medium containing 2% B27 serum-free supplement, 1% v/v penicillin/streptomycin

422 (P/S), 0.5 mM glutamine, and 10  $\mu$ M glutamate (Sigma-Aldrich). Dissociated cells  
423 were then plated at a density of 0.03 - 0.05 x 10<sup>6</sup> cells per cm<sup>2</sup> onto 12 mm round  
424 coverslips in 24-well plates (Corning Costar®, for lentivirus infection and  
425 immunofluorescence staining), glass bottom confocal dishes (801002, NEST  
426 Biotechnology, for vesicle detection) or 6-well plates (Corning Costar®, for Western  
427 blotting and ELISA assay) pre-coated with poly-D-lysine (PDL, 50  $\mu$ g per ml;  
428 Sigma-Aldrich). Cultures were kept at 37°C in a 5% v/v CO<sub>2</sub> humidified incubator.  
429 Thereafter, one third to half of the medium was replaced twice a week with  
430 Neurobasal culture medium containing 2% B27 supplement and 0.5 mM glutamine.

431 Single-cell micro-island cultures of hippocampal neurons were prepared from  
432 E18 mice<sup>7</sup>. Briefly, 6.5 mm Transwell® inserts (pore size 0.4  $\mu$ m; BD Biosciences) in  
433 24 well plates were coated with PDL (12 h before culture), and coverslips were  
434 sprayed with island substrate solution containing 1 mg per ml PDL and 3 mg per ml rat  
435 tail collagen (A1048301, Thermo Fisher Scientific) using a presterilized glass atomizer  
436 (3 h before culture). Dissociated cells for micro-island cultures were similarly prepared  
437 as dissociated cells for primary hippocampal neuron cultures. Dissociated cells were  
438 then plated at a density of 2000 cells per cm<sup>2</sup> onto coverslips in 24-well plates (for  
439 micro-island culture) or at a density of 50000 cells per cm<sup>2</sup> in Transwell® inserts in  
440 24-well plates (as high density neuronal feeder layer). After an adherence time of 4 h,  
441 the transwell inserts with neurons (high density) were placed into 24-well plates with  
442 neurons on coverslips (low density). The low density system can facilitate the survival  
443 of sparse individual neurons grown in islands of PDL substrates and thus the

444 formation of autaptic connections. In addition, co-culture with high density neurons  
445 may allow low density neurons to receive trophic support that is sufficient to enable  
446 long term survival. Cultures were kept at 37°C in a 5% v/v CO<sub>2</sub> humidified incubator.  
447 Thereafter, one third to half of the medium was replaced every five days with  
448 Neurobasal culture medium containing 2% B27 supplement and 0.5 mM glutamine.

449 Astrocyte cultures were prepared from 0-1-day-old (P0-1) mice<sup>7</sup>. Cortices were  
450 dissected from 0-1-day-old mice and digested with 0.25% w/v trypsin in DMEM.  
451 Tissue was triturated and resuspended after centrifugation in astrocyte culture  
452 medium [DMEM containing 10% v/v fetal bovine serum (FBS), 1% v/v P/S]. Cells were  
453 plated in T-75 flasks at a density of 2 cortices per flask (Corning Costar®) pre-coated  
454 with PDL. Cells were grown for at least 7 days at 37°C with 5% v/v CO<sub>2</sub>, and a  
455 complete medium change was performed every other day. At confluence after  
456 DIV8-10, cultures were shaken for 12-16 h at 250 g at 37°C on an orbital shaker  
457 (KS4000i Control Incubating Shaker, IKA) followed by an incubation in culture  
458 medium containing 20 µM cytosine-1-β-D-arabinofuranosid (Sigma-Aldrich) for 2-3  
459 days to deplete the precursor cells and to achieve a confluent layer of astrocytes.  
460 Astrocytes were then subcultured in PDL-coated glass bottom confocal dishes via  
461 enzymatic digestion with 0.05% w/v trypsin with EDTA for Ca<sup>2+</sup> imaging experiments.

#### 462 **FM1-43 loading and synaptic vesicle detection**

463 Cultured neurons (DIV14) were transferred into a standard bath solution containing (in  
464 mM): 145 NaCl, 5 KCl, 2 CaCl<sub>2</sub>, 2 MgCl<sub>2</sub>, 10 glucose and 10 HEPES. We also added  
465 10 µM DNQX (Abcam) and 40 µM D-AP5 (Abcam) to the bath to inhibit AMPA and

466 NMDA receptors. Neurons were then incubated with 5  $\mu$ M FM1-43 (70030, Biotium) in  
467 a hyperkalemic bath solution (in mM: 31.5 NaCl, 90 KCl, 2 CaCl<sub>2</sub>, 2 MgCl<sub>2</sub>, 25 HEPES  
468 and 30 glucose) for 90 s. Neurons were then perfused with the normal bath solution  
469 for 10 min followed by adding ADVASEP-7 (1 mM, 70029, Biotium) for 60 s to reduce  
470 background fluorescence. After an additional 10 min wash with the normal bath  
471 solution, images were taken by a confocal laser-scanning microscope (Nikon A1).  
472 FM1-43-loaded vesicles were viewed through a 40X oil-immersion objective  
473 (numerical aperture 1.3) and images were acquired at a resolution of 1024 X 1024  
474 pixel at RT.

#### 475 **Western blotting**

476 Hippocampi were obtained and homogenized using a chilled Vibrahomogenizer (Vibra  
477 cell, SONICS) in 2 ml of RIPA buffer [1% Triton X-100, 0.1% SDS, 150 mM NaCl, 2  
478 mM EDTA, 50 mM NaF, 10 mM sodium pyrophosphate, 1.0 mM Na<sub>3</sub>VO<sub>4</sub>, 1.0 mM  
479 PMSF, and complete protease inhibitor cocktail (Roche)]. The lysate was then  
480 centrifuged at 20,000 g for 20 min at 4°C and the supernatant collected for Western  
481 blot analysis. The protein concentration of the probes was determined using the  
482 Pierce™ BCA Protein Assay Kit (Thermo Fisher Scientific) and the tubes were stored  
483 at -20°C. Proteins were separated on SDS-PAGE under denaturing conditions (for  
484 Efr3a, 10-15% Mini-PROTEAN TGX Gels, Bio-Rad; for A $\beta$  and CTFs, 16.5%  
485 Tris-Tricine Gels, WSHT Biotech Inc.) and transferred to polyvinylidene fluoride  
486 (PVDF) microporous membrane (Millipore). The membranes were then blocked with  
487 5% skim milk-TBS (for A $\beta$ ) or 0.35% gelatin-TBST (for other proteins) at RT for 1.5 h

488 and incubated with the primary antibodies over night at 4°C followed by  
489 HRP-conjugated secondary antibodies (Thermo Fisher Scientific) at RT for 1.5 h.  
490 Protein bands were then visualized using the ECL Western blotting detection  
491 substrate (Thermo Fisher Scientific). Densitometric analyses were determined using  
492 ImageJ software and normalized to  $\beta$ -actin.

### 493 **Cultured neuron recording**

494 Single-cell micro-island neuron cultures at DIV14 were transferred to a chamber  
495 perfused with the standard bath solution containing (in mM): 145 NaCl, 5 KCl, 2 CaCl<sub>2</sub>,  
496 2 MgCl<sub>2</sub>, 10 glucose and 10 HEPES (pH 7.40, 290 - 310 mOsm). Neurons were  
497 recorded with patch pipettes (4 - 6 M $\Omega$ ) filled with artificial intracellular fluid (in mM:  
498 100 CsCH<sub>3</sub>SO<sub>3</sub>, 20 KCl, 10 HEPES, 4 Mg-ATP, 0.3 Tris-GTP, 7 Tris<sub>2</sub>-Phosphocreatine,  
499 3 QX-314; pH 7.3, 285-290 mOsm). Neurons were voltage clamped at -70 mV with a  
500 Heka EPC 10 amplifier and mEACs were recorded at 32°C in bath solution containing  
501 0.5  $\mu$ M TTX and 10  $\mu$ M bicuculline. Individual events were counted and analyzed with  
502 MiniAnalysis software.

### 503 **Lipid strip assay**

504 PIP Strips™ membranes (P23751, Thermo Fisher Scientific) were blocked with 0.1%  
505 ovalbumin (albumin from chicken egg white powder, A5253, Sigma-Aldrich) in TBST  
506 for 1 h at RT, and then incubated with 50 ng per ml anti-PIP<sub>2</sub> antibody in 0.1%  
507 ovalbumin in TBST at RT for 1 h. After being washed with TBST for three times,  
508 HRP-conjugated secondary antibody was added at RT for 1 h. Protein bands were  
509 then visualized using the ECL western blotting detection substrate (Thermo Fisher

510 Scientific).

### 511 **ELISA PIP<sub>2</sub> assay**

512 Mass ELISA Kit K-4500 from Echelon Biosciences was used to determine PIP<sub>2</sub> levels  
513 in hippocampi from WT and APP/PS1 mice (6-7-month-old) and in primary cultured  
514 hippocampal neurons from WT and *Efr3a*<sup>+/-</sup> mice<sup>9</sup>. Briefly, hippocampi were dissected  
515 and cut into small pieces using a pair of ophthalmic scissors, and were then  
516 transferred into a 1.5 ml centrifuge tube containing 1 ml ice-cold 0.5 mM  
517 trichloroacetic acid (TCA) immediately. Cultured neurons were incubated in TCA on  
518 ice for 5 min after the medium was carefully aspirated, and then were collected and  
519 transferred into a 1.5 ml centrifuge tube. The tubes were then centrifuged at 3000 g  
520 for 7 min at 4°C. The pellet was resuspended in 1 ml 5% TCA/1 mM EDTA solution  
521 and vortexed for 30 s. After centrifuging twice at 3000 g for 5min, the pellet was  
522 resuspended in the MeOH: CHCl<sub>3</sub>: 12 N HCl (80:40:1; 750 µl) solution and vortexed  
523 for 25 min at RT to extract lipids. After centrifuging again at 3000 g for 5 min, the  
524 supernatant was transferred to a 2 ml centrifuge tube and 250 µl CHCl<sub>3</sub> and 450 µl 0.1  
525 mM HCl were added. After vortexing for 30 s, the organic and aqueous phases were  
526 separated by centrifuging at 3000 g for 5min. The organic (lower) phase (0.5 ml) was  
527 collected and transferred into a 1.5 ml centrifuge tube and dried under a slight stream  
528 of nitrogen. PIP<sub>2</sub> and other PIPs [PI4P, PI(3,4)P<sub>2</sub>, PI(3,5)P<sub>2</sub>, and PI(3,4,5)P<sub>3</sub>] were  
529 then detected according to the manufacturer's instructions.

### 530 **Immunocytochemistry**

531 Immunofluorescence staining was carried out in cultured neurons at DIV14 (or DIV12



532 for lentivirus-infected neurons)<sup>7</sup>. Briefly, neurons were fixed by 4% paraformaldehyde  
533 in PBS for 15 min and permeabilized by 0.2% Triton X-100 for 10 min. Neurons were  
534 blocked with 10% BSA in PBS for 2.5 h at RT, and then incubated with mouse  
535 anti-PIP<sub>2</sub> antibody in PBS containing 3% BSA for 1 h. After being washed with PBS for  
536 three times, fluorescent secondary antibody (Alexa Fluor 488 goat anti-mouse IgM mu  
537 chain) was added for 1 h. After being washed with PBS three times, neurons were  
538 then blocked again with 10% BSA for 1.5 h and then were incubated with rabbit  
539 anti-MAP2 and chicken anti-NF antibodies for 1 h. After being washed again with PBS  
540 for three times, fluorescent secondary antibodies [Alexa Fluor 546 anti-rabbit IgG (or  
541 Alexa Fluor 405 anti-rabbit IgG for infected neurons) and 647 anti-chicken IgY H&L]  
542 were added for 1 h. Neurons were mounted with mounting reagent for subsequent  
543 fluorescent image acquisition after being washed with PBS to remove unbound  
544 secondary antibodies. For co-staining with mGluR5, neurons were permeabilized  
545 before the second blocking step, and the following antibodies were used: mouse  
546 anti-MAP2, chicken anti-NF, rabbit anti-mGluR5, Alexa Fluor 546 anti-mouse, 647  
547 anti-chicken IgY H&L, and 488 anti-rabbit IgG. Fluorescent images were acquired  
548 through a 60X oil-immersion objective (numerical aperture 1.4) using a Nikon A1  
549 confocal laser-scanning microscope. Gain, threshold, and black levels were not  
550 subjected to change during individual experiments. Neuronal images were analyzed  
551 using MetaMorph with customized filter sets. All image analysis was done blind to the  
552 experimental condition.

### 553 **Lentivirus-shRNA infection**

554 To knock down PLC $\beta$ 1 or PLC $\beta$ 4 in primary hippocampal neurons, we infected  
555 hippocampal neuron cultures with lentiviruses carrying DsRed-PLC $\beta$ 1-shRNA  
556 (PLC $\beta$ 1-shRNA), DsRed-PLC $\beta$ 4-shRNA (PLC $\beta$ 4-shRNA), or DsRed-scramble-shRNA  
557 (Ctrl-shRNA) that were chemically synthesized by Obio Technology (Shanghai) Corp.,  
558 Ltd. Target sequences for PLC $\beta$ 1, PLC $\beta$ 4 and Ctrl siRNAs are  
559 GCTGTCTTTGTCTACATAGAA (GenBank accession number: NM\_019677),  
560 GCGACAAATGAGCCGCATT (GenBank accession number: NM\_013829), and  
561 TTCTCCGAACGTGTCACGT, respectively. Hippocampal neurons at DIV7 were  
562 infected with lentiviruses according to the vendor's protocol. Neurons were then  
563 treated with A $\beta$  or DMSO 72 h after lentiviral infection, and were subsequently used  
564 for Western blotting (interference efficiency detection) or immunofluorescence  
565 staining.

#### 566 **Ca<sup>2+</sup> imaging**

567 Changes in [Ca<sup>2+</sup>]<sub>i</sub> were measured in cultured astrocytes from WT and *Efr3a*<sup>+/-</sup> mice  
568 using the calcium-sensitive fluorescent dye Fluo-4 (14201, Thermo Fisher Scientific).  
569 Astrocyte cultures were washed with Krebs buffer (in mM: 118 NaCl, 4.7 KCl, 4  
570 NaHCO<sub>3</sub>, 1.2 MgSO<sub>4</sub>, 1.2 KH<sub>2</sub>PO<sub>4</sub>, 8.5 HEPES, 1.3 CaCl<sub>2</sub>, 11.7 glucose, pH 7.4) and  
571 incubated with 4  $\mu$ M Fluo-4 in Krebs buffer first at 37°C for 15 min, then at RT for 15  
572 min. Astrocytes loaded with Fluo-4 were excited at 488 nm and fluorescence emission  
573 was detected at 525 nm. The images were taken through a 60X oil-immersion  
574 objective (numerical aperture 1.4) by a Nikon A1 confocal laser-scanning microscope.  
575 After baseline data (F<sub>0</sub>) were taken, we recorded fluorescent signals (F) in the

576 presence of 100  $\mu$ M DHPG or 400 nM oligomeric A $\beta$ . The relative Fluo-4 fluorescent  
577 signals expressed in arbitrary units ( $F/F_0$ ) were analyzed for individual cells using  
578 MetaMorph with a fixed set of parameters.

#### 579 **MWM test**

580 The MWM tests were performed in a circular tank (120 cm in diameter and 60 cm in  
581 height) filled with opaque water at 25°C. The tank was divided into four quadrants with  
582 different navigation landmarks for each quadrant. 24 h before the acquisition test, a  
583 visible platform task was performed by measuring the time spent to find a colorful flag  
584 placed on the top of a platform in a quadrant. The visible platform task was tested in  
585 each quadrant to avoid habituation. In the hidden platform acquisition test, mice were  
586 allowed to swim freely to search for the escape platform within 60 s. The platform  
587 location remained constant throughout the test. The time taken to reach the platform  
588 was recorded as the escape latency. The mouse was allowed to stay on the platform  
589 for 10 s after the hidden platform was found. If a mouse failed to find the platform  
590 within 60 s, the mouse was guided to the platform and stayed on the platform for 10 s,  
591 and the escape latency was recorded as 60 s for this trial. The same animal was then  
592 released from a new insertion point 4 min after the previous trial. The experiment was  
593 repeated 4 times per mouse each day for 5 days. The four animal insertion points  
594 were chosen to maintain a constant distance to the platform. The mean escape  
595 latency was calculated to evaluate the spatial learning ability. 24 h after the hidden  
596 platform acquisition test, probe trials were conducted by removing the platform. Mice  
597 were placed in the diagonal quadrant of the hidden platform originally located and

598 were allowed to swim freely in the pool for 60 s. The numbers of entries into the area  
599 where the original platform was located and crossings over the original platform were  
600 recorded. The data were analyzed by the WaterMaze Software (Actimetrics, INC.).  
601

602 **References**

- 603 1. Qian, Q. et al. Brain-specific ablation of Efr3a promotes adult hippocampal neurogenesis via  
604 the brain-derived neurotrophic factor pathway. *FASEB J.* **31**, 2104-2113 (2017).
- 605 2. Hu, H. et al. Efr3a Insufficiency Attenuates the Degeneration of Spiral Ganglion Neurons after  
606 Hair Cell Loss. *Front. Mol. Neurosci.* **10**, 86 (2017).
- 607 3. Harris, J.A. et al. Transsynaptic progression of amyloid-beta-induced neuronal dysfunction  
608 within the entorhinal-hippocampal network. *Neuron* **68**, 428-441 (2010).
- 609 4. Klyubin, I. et al. Amyloid beta protein immunotherapy neutralizes Abeta oligomers that  
610 disrupt synaptic plasticity in vivo. *Nat. Med.* **11**, 556-561 (2005).
- 611 5. Tampellini, D. et al. Internalized antibodies to the Abeta domain of APP reduce neuronal  
612 Abeta and protect against synaptic alterations. *J. Biol. Chem.* **282**, 18895-18906 (2007).
- 613 6. Lauren, J., Gimbel, D.A., Nygaard, H.B., Gilbert, J.W. & Strittmatter, S.M. Cellular prion  
614 protein mediates impairment of synaptic plasticity by amyloid-beta oligomers. *Nature* **457**,  
615 1128-1132 (2009).
- 616 7. Shen, Y. et al. Postnatal activation of TLR4 in astrocytes promotes excitatory synaptogenesis  
617 in hippocampal neurons. *J. Cell. Biol.* **215**, 719-734 (2016).
- 618 8. Zhou, Y.D. et al. Arrested maturation of excitatory synapses in autosomal dominant lateral  
619 temporal lobe epilepsy. *Nat. Med.* **15**, 1208-1214 (2009).
- 620 9. Trovo, L. et al. Low hippocampal PI(4,5)P(2) contributes to reduced cognition in old mice as a  
621 result of loss of MARCKS. *Nat. Neurosci.* **16**, 449-455 (2013).

622
